# Supplementary material
Source: PubMed Central journal article supplement (PMC5865749)
Supplement: NIHMS75765-supplement-Supplementary_notes.pdf [file NIHMS75765-supplement-Supplementary_notes.pdf]

## 1 ***Plectus sambesii* assembly methods: Supplementary Note 1**

2  
3 We acquired ~250M 150bp paired-end genome sequencing read pairs with 550bp  
4 insert size through Edinburgh Genomics. Quality control of the genome sequencing  
5 data was performed using Fastqc v0.10.1 (Andrews, 2010), and reads were quality  
6 trimmed using skewer v0.2.2 (Jiang et al., 2014) with parameters `-q 30 -l 51`. K-mer  
7 plots were generated with kmc, which revealed extensive heterozygosity. A  
8 preliminary single-end assembly was generated with Velvet (Zerbino and Birney,  
9 2008) to screen for contaminants but no significant hits were found using Blobtools  
10 (Kumar et al., 2013; Laetsch, 2016). The dataset was digitally normalised to 40x  
11 coverage and assembly was carried out with SPAdes v3.5.1 (Bankevich et al., 2012)  
12 with parameters `--k 21,33,55,77,99 --cov-cutoff auto --careful`. Error correction of the  
13 sequencing reads was done with BayesHammer that runs as part of the SPAdes  
14 pipeline. Examination of the resulting distribution of contig coverages revealed a  
15 bimodal distribution of coverage indicating again heterozygosity. Haplocontigs were  
16 collapsed and postprocessed with Redundans (Pryszcz and Gabaldón, 2016), that  
17 runs SSPACE3 (Boetzer et al., 2011) and SOAPdenovo Gapcloser internally. The  
18 identity percentage for the collapse of redundant contigs was chosen to be of 90%,  
19 ensuring the presence of 95.97% of CEGMA KOGs (Parra et al., 2007). Lower  
20 identity percentage values did not result in an appreciable reduction of the span  
21 suggesting that most heterozygous regions are collapsed at that threshold. Blobplot  
22 analysis after postprocessing revealed ~20Mb of bacterial contaminant sequence at  
23 60% GC and lower coverage than the nematode contigs, which we therefore  
24 excluded from the final assembly.

25  
26 To annotate genes, we first masked repeats in the assembly. We used  
27 RepeatModeler v1.0.8 (Smit and Hubley, 2008) to generate a species-specific repeat  
28 library that was concatenated with a nematode repeat library extracted from  
29 RepBase RepeatMasker edition update 27-01-2017. The combined library was used  
30 to mask the genome with RepeatMasker v4.0.7 (Smit et al., 2013). To annotate the  
31 genome, we acquired ~100M RNA-seq reads from rRNA-depleted paired-end RNA-  
32 seq libraries generated in the LMS Genomics Facility. Quality control of the RNA-seq  
33 reads was performed with Fastqc and Skewer with parameters `-q 30 -l 50`. Spliced  
34 alignment of the reads to the masked assembly was done with STAR v2.5.2 (Dobin  
35 et al., 2013) with default parameters except for `--twopassMode Basic`. RNA-seq  
36 alignments were used for automated HMM training and annotation using BRAKER  
37 v1.9 (Hoff et al., 2016) with parameters `--softmasking 1 --UTR off --gff3`, running  
38 internally GeneMark-ET v4.21 (Lomsadze et al., 2014) and augustus v2.3.2 (Stanke  
39 and Morgenstern, 2005).

## 41 **References**

- 42  
43  
44 Andrews, S. (2010). FastQC A Quality Control tool for High Throughput Sequence  
45 Data. [Http://www.bioinformatics.babraham.ac.uk/projects/fastqc/](http://www.bioinformatics.babraham.ac.uk/projects/fastqc/).  
46 Bankevich, A., Nurk, S., Antipov, D., Gurevich, A. a., Dvorkin, M., Kulikov, A.S.,  
47 Lesin, V.M., Nikolenko, S.I., Pham, S., Pribelski, A.D., et al. (2012). SPAdes: A New  
48 Genome Assembly Algorithm and Its Applications to Single-Cell Sequencing. *J.*  
49 *Comput. Biol.* 19, 455–477.  
50 Boetzer, M., Henkel, C. V, Jansen, H.J., Butler, D., and Pirovano, W. (2011).

51 Scaffolding pre-assembled contigs using SSPACE. *Bioinformatics* 27, 578–579.  
52 Dobin, A., Davis, C.A., Schlesinger, F., Drenkow, J., Zaleski, C., Jha, S., Batut, P.,  
53 Chaisson, M., and Gingeras, T.R. (2013). STAR: ultrafast universal RNA-seq aligner.  
54 *Bioinformatics* 29, 15–21.  
55 Hoff, K.J., Lange, S., Lomsadze, A., Borodovsky, M., and Stanke, M. (2016).  
56 BRAKER1: Unsupervised RNA-Seq-Based Genome Annotation with GeneMark-ET  
57 and AUGUSTUS. *Bioinformatics* 32, 767–769.  
58 Jiang, H., Lei, R., Ding, S.-W., and Zhu, S. (2014). Skewer: a fast and accurate  
59 adapter trimmer for next-generation sequencing paired-end reads. *BMC*  
60 *Bioinformatics* 15, 182.  
61 Kumar, S., Jones, M., Koutsovoulos, G., Clarke, M., and Blaxter, M. (2013).  
62 Blobology: exploring raw genome data for contaminants, symbionts and parasites  
63 using taxon-annotated GC-coverage plots. *Front. Genet.* 4, 237.  
64 Laetsch, D. (2016). Blobtools. GitHub Repos.  
65 Lomsadze, A., Burns, P.D., and Borodovsky, M. (2014). Integration of mapped RNA-  
66 Seq reads into automatic training of eukaryotic gene finding algorithm. *Nucleic Acids*  
67 *Res.* 42, e119.  
68 Parra, G., Bradnam, K., and Korf, I. (2007). CEGMA: A pipeline to accurately  
69 annotate core genes in eukaryotic genomes. *Bioinformatics* 23, 1061–1067.  
70 Prysycz, L.P., and Gabaldón, T. (2016). Redundans: an assembly pipeline for highly  
71 heterozygous genomes. *Nucleic Acids Res.* 44, e113–e113.  
72 Smit, A., and Hubley, R. (2008). RepeatModeler Open-1.0.  
73 Smit, A., Hubley, R., and Green, P. (2013). RepeatMasker Open-4.0.  
74 Stanke, M., and Morgenstern, B. (2005). AUGUSTUS: A web server for gene  
75 prediction in eukaryotes that allows user-defined constraints. *Nucleic Acids Res.* 33,  
76 465–467.  
77 Zerbino, D.R., and Birney, E. (2008). Velvet: Algorithms for de novo short read  
78 assembly using de Bruijn graphs. *Genome Res.* 18, 821–829.  
79

1 **Supplementary Note 2: Phylogeny References**

2 **Protozoa**

3 Sierra, R., Matz, M. V., Aglyamova, G., Pillet, L., Decelle, J., Not, F., et al. (2013).  
4 Deep relationships of Rhizaria revealed by phylogenomics: A farewell to Haeckel's  
5 Radiolaria, *Molecular Phylogenetics and Evolution*, 67(1), 53–59.

6 <http://doi.org/10.1016/j.ympev.2012.12.011>

7

8 Cavalier-Smith, T., Fiore-Donno, A. M., Chao, E., Kudryavtsev, A., Berney, C.,  
9 Snell, E. A., & Lewis, R. (2015). Multigene phylogeny resolves deep branching of the  
10 Amoebozoa. *Molecular Phylogenetics and Evolution*, 83(C), 293–304.

11 <http://doi.org/10.1016/j.ympev.2014.08.011>

12

13 Derelle, R., Lopez-Garcia, P. N., Timpano, H. L. N., & Moreira, D. (2016). A  
14 Phylogenomic Framework to Study the Diversity and Evolution of Stramenopiles  
15 (=Heterokonts). *Molecular Biology and Evolution*, 33(11), 2890–2898.

16 <http://doi.org/10.1093/molbev/msw168>

17

18 Jinkerson, R. E., Radakovits, R., & Posewitz, M. C. (2014). Genomic insights from  
19 the oleaginous model alga *Nannochloropsis gaditana*. *Bioengineered*, 4(1), 37–43.

20 <http://doi.org/10.4155/bfs.11.7>

21

22 Fritz-Laylin, L. K., Prochnik, S. E., Ginger, M. L., Dacks, J. B., Carpenter, M. L.,  
23 Field, M. C., et al. (2010). The Genome of *Naegleria gruberi* Illuminates Early  
24 Eukaryotic Versatility. *Cell*, 140(5), 631–642.

25 <http://doi.org/10.1016/j.cell.2010.01.032>

26

27 Read, B. A., Kegel, J., Klute, M. J., Kuo, A., Lefebvre, S. C., Maumus, F., et al.  
28 (2014). Pan genome of the phytoplankton *Emiliana underpins* its global distribution.

29 *Nature*, 499(7457), 209–213. <http://doi.org/10.1038/nature12221>

30

31 **Microsporidia**

32

33 Vossbrinck, C.R., Debrunner-Vossbrinck, B.A., & Weiss, L.M., 2014 Phylogeny of  
34 the Microsporidia (2014). In *Microsporidia, Pathogens of opportunity*, Edited Weiss,  
35 L and Becnel, J, Wiley.

36

37 **Fungi**

38

39 Sugiyama, I., Hosaka, K., Suh S.O (2006). Early diverging Ascomycota: phylogenetic  
40 divergence and related evolutionary enigmas. *Mycologia*, 98(6), 996-1005.

41

42 Hibbert D.S., (2006). A phylogenetic overview of the Agaricomycotina, *Mycologia*.  
43 98(6):917-25.

44

45 James, T. Y., Kauff, F., Schoch, C. L., Matheny, P. B., Hofstetter, V. R., Cox, C. J., et  
46 al. (2006). Reconstructing the early evolution of Fungi using a six-gene phylogeny.

47 *Nature*, 443(7113), 818–822. <http://doi.org/10.1038/nature05110>

48

49 Masneuf-Pomarede, I., Bely, M., Marullo, P., & Albertin, W. (2016). The Genetics of  
50 Non-conventional Wine Yeasts: Current Knowledge and Future Challenges. *Frontiers*  
51 *in Microbiology*, 6(1569), 702. <http://doi.org/10.1016/j.ijfoodmicro.2011.08.026>

Supplementary Note 3: sample numbers for genome-wide comparisons

CGs covered by >10 reads used for significance testing in Figure 1c

*Plectus sambesii*

gene 1230239

rRNA 1193

LTR 7069

DNA 1599

unannotated 727548

*Romanomermis culicivorax*

gene 656710

rRNA 561

LTR 4897

DNA 1830

unannotated 124399

*Trichuris muris*

gene 2115909

rRNA 3183

LTR 79067

DNA 51875

unannotated 1247125

*Trichinella spiralis*

gene 738591

rRNA 291

LTR 21480

DNA 3540

unannotated 193453

*Caenorhabditis briggsae*

gene 82526

rRNA 708

LTR 590

DNA 3725

unannotated 59570

*Nippostrongylus brasiliensis*

Gene 20765

rRNA 926

DNA 1199

LTR 2879

unannotated 12940

Analysed genomes: number of genome-wide Cs and CGs

*P. sambesii*

|           |          |
|-----------|----------|
| total_C   | 29615596 |
| total_CG  | 7728644  |
| total_CGA | 2355653  |
| total_CGC | 2169535  |
| total_CGG | 1402387  |
| total_CGT | 1793453  |

*R. culicivorax*

|           |          |
|-----------|----------|
| total_C   | 48473942 |
| total_CG  | 7829396  |
| total_CGA | 2785794  |
| total_CGC | 1457635  |
| total_CGG | 1529381  |
| total_CGT | 2050824  |

*T. spiralis*

|           |         |
|-----------|---------|
| total_C   | 9943967 |
| total_CG  | 1710706 |
| total_CGA | 539942  |
| total_CGC | 348898  |
| total_CGG | 309852  |
| total_CGT | 511933  |

*T. muris*

|           |          |
|-----------|----------|
| total_C   | 18839135 |
| total_CG  | 4505970  |
| total_CGA | 1184822  |
| total_CGC | 1125042  |
| total_CGG | 921658   |
| total_CGT | 1274273  |

*N. brasiliensis*

|           |          |
|-----------|----------|
| total_C   | 58220992 |
| total_CG  | 12740122 |
| total_CGA | 4131434  |
| total_CGC | 2803568  |
| total_CGG | 2582339  |
| total_CGT | 3221088  |

*C. briggsae*

|           |          |
|-----------|----------|
| total_C   | 19684666 |
| total_CG  | 3455622  |
| total_CGA | 1266130  |
| total_CGC | 588973   |
| total_CGG | 765446   |
| total_CGT | 834762   |

*B. mori*

|           |          |
|-----------|----------|
| total_C   | 79039767 |
| total_CG  | 16946963 |
| total_CGA | 4852595  |
| total_CGC | 3693029  |
| total_CGG | 3551168  |
| total_CGT | 4848034  |

*M. musculus*

|           |          |
|-----------|----------|
| total_C   | 38179275 |
| total_CG  | 1428189  |
| total_CGA | 354635   |
| total_CGC | 299758   |
| total_CGG | 374931   |
| total_CGT | 398865   |

Analysed genomes: CGs within  $\pm 1000$ bp of TSS with sufficient coverage to estimate methylation (see Supplemental Figure 3)

*P. sambesii* 2002411  
*R. culicivora*x 6231622  
*T. spiralis* 1055855  
*T. muris* 1632567

CGs in 1st exon vs introns analysed (Supplemental Figure 3)

*P. sambesii* 480833e,4352323i  
*R. culicivora*x 2506380e,5629056i  
*T. spiralis* 502608e,1992647i  
*T. muris* 287818e,2699672i

total number of genes analysed with DNA methylation coverage for repeat homology (Supplemental Figure 2)

*P. sambesii* 38467  
*R. culicivora*x 43622  
*T. spiralis* 12913  
*T. muris* 10932
