# Supplementary material
Source: PubMed Central journal article supplement (PMC5865749)
Supplement: NIHMS75765-supplement-Supplementary_tables.pdf [file NIHMS75765-supplement-Supplementary_tables.pdf]

### Supplementary Table 1: Library statistics

|                | Mapped reads | Mean Coverage | PCR duplicates (%) | Non-conversion(%)* |
|----------------|--------------|---------------|--------------------|--------------------|
| R. culicivorax | 15100281.00  | 6.30          | 0.12               | 0.66               |
| P. sambesii    | 17029848.00  | 10.30         | 0.10               | 0.71               |
| T. spiralis    | 7589350.00   | 15.72         | 0.17               | 0.64               |
| T.muris        | 19491243.00  | 24.78         | 0.10               | 0.61               |

\*%mC/C unmethylated APC standard

Supplementary Table 2

Gene

nRc.2.0.1.t01079-RA;probable xaa-pro aminopeptidase 3 os=homo sapiens gn=xpnpep3 pe=1 sv=1  
nRc.2.0.1.t03560-RA;---NA---  
nRc.2.0.1.t44210-RA;ligand-gated ion channel 50 os=caenorhabditis elegans gn=lgc-50 pe=2 sv=2  
nRc.2.0.1.t22686-RA;homeobox protein hox-b1a os=danio rerio gn=hoxb1a pe=2 sv=2  
nRc.2.0.1.t16735-RA;somatostatin receptor type 1 os=homo sapiens gn=sstr1 pe=1 sv=1  
nRc.2.0.1.t41535-RA;---NA---  
nRc.2.0.1.t27186-RA;serine protease 27 os=homo sapiens gn=prss27 pe=1 sv=1  
nRc.2.0.1.t46500-RA;replication factor c subunit 1 os=drosophila melanogaster gn=gfn1 pe=1 sv=2  
nRc.2.0.1.t45911-RA;---NA---  
nRc.2.0.1.t28252-RA;n-alpha-acetyltransferase 20 os=xenopus tropicalis gn=naa20 pe=2 sv=1  
nRc.2.0.1.t19193-RA;polymerase delta-interacting protein 2 os=mus musculus gn=poldip2 pe=2 sv=1  
nRc.2.0.1.t02098-RA;---NA---  
nRc.2.0.1.t45638-RA;---NA---  
nRc.2.0.1.t27084-RA;protein tag-256 os=caenorhabditis elegans gn=tag-256 pe=2 sv=1  
nRc.2.0.1.t06626-RA;---NA---  
nRc.2.0.1.t36671-RA;---NA---  
nRc.2.0.1.t26716-RA;---NA---  
nRc.2.0.1.t32382-RA;dehydrogenase reductase sdr family member 13 os=mus musculus gn=dhrs13 pe=1 sv=1  
nRc.2.0.1.t34523-RA;gag-pol polyprotein os=human immunodeficiency virus type 1 group o (isolate ant70) gn=gag-pol pe=3 sv=3  
nRc.2.0.1.t30178-RA;huntingtin os=takifugu rubripes gn=htt pe=3 sv=1  
nRc.2.0.1.t34697-RA;homeobox protein hox-b1 os=homo sapiens gn=hoxb1 pe=1 sv=2  
nRc.2.0.1.t02965-RA;wd repeat-containing protein 82 os=danio rerio gn=wdr82 pe=2 sv=1  
nRc.2.0.1.t25741-RA;muscarinic acetylcholine receptor gar-3 os=caenorhabditis elegans gn=gar-3 pe=1 sv=2  
nRc.2.0.1.t20407-RA;tyrosinase-like protein tyr-3 os=caenorhabditis elegans gn=tyr-3 pe=2 sv=5  
nRc.2.0.1.t14324-RA;pogo transposable element with krab domain os=homo sapiens gn=pogk pe=1 sv=2  
nRc.2.0.1.t31951-RA;ligand-gated ion channel 50 os=caenorhabditis elegans gn=lgc-50 pe=2 sv=2  
nRc.2.0.1.t18153-RA;---NA---  
nRc.2.0.1.t15625-RA;transposon ty3-i gag-pol polyprotein os=saccharomyces cerevisiae;(strain atcc 204508 s288c);gn=ty3b-l;pe=3  
nRc.2.0.1.t46595-RA;phosphorylase b kinase gamma catalytic skeletal muscle isoform os=homo sapiens gn=phkg1 pe=2 sv=3  
nRc.2.0.1.t37063-RA;kappa-type opioid receptor os=cavia porcellus gn=oprk1 pe=2 sv=1  
nRc.2.0.1.t38943-RA;toll-like protein 1 os=xenopus laevis gn=tl1 pe=1 sv=1  
nRc.2.0.1.t28502-RA;---NA---  
nRc.2.0.1.t07697-RA;retrovirus-related pol polyprotein from transposon 412 os=drosophila melanogaster gn=pol pe=4 sv=1  
nRc.2.0.1.t14707-RA;---NA---  
nRc.2.0.1.t20709-RA;---NA---  
nRc.2.0.1.t41025-RA;uncharacterized protein os=caenorhabditis elegans gn= pe=2 sv=1  
nRc.2.0.1.t23446-RA;transposon ty3-i gag-pol polyprotein os=saccharomyces cerevisiae;(strain atcc 204508 s288c);gn=ty3b-l;pe=3  
nRc.2.0.1.t09475-RA;uncharacterized protein os=caenorhabditis elegans gn= pe=2 sv=1  
nRc.2.0.1.t08338-RA;---NA---  
nRc.2.0.1.t24837-RA;---NA---  
nRc.2.0.1.t46402-RA;---NA---  
nRc.2.0.1.t28253-RA;bombesin receptor subtype-3 os=homo sapiens gn=brs3 pe=1 sv=1  
nRc.2.0.1.t34655-RA;zinc metalloproteinase nas-4 os=caenorhabditis elegans gn=nas-4 pe=2 sv=4  
nRc.2.0.1.t14443-RA;carbonyl reductase 1 os=bos taurus gn=cbr1 pe=2 sv=1  
nRc.2.0.1.t21879-RA;pol polyprotein os=feline endogenous virus ece1 gn=pol pe=3 sv=1

Supplementary Table 2

nRc.2.0.1.t17239-RA;protein-tyrosine sulfotransferase 2 os=bos taurus gn=tpst2 pe=2 sv=1  
nRc.2.0.1.t02364-RA;potassium-transporting atpase alpha chain 2 os=cavia porcellus gn=atp12a pe=2 sv=1  
nRc.2.0.1.t31882-RA;death-associated protein kinase 1 os=homo sapiens gn=dapk1 pe=1 sv=6  
nRc.2.0.1.t32157-RA;retinol dehydrogenase 11 os=mus musculus gn=rdh11 pe=2 sv=2  
nRc.2.0.1.t48314-RA;duoxa-like protein os=caenorhabditis elegans gn= pe=2 sv=2

Supplementary Table 3

| number | Description                                                                                  |
|--------|----------------------------------------------------------------------------------------------|
| 1      | GO:0000003; reproduction; biological_process                                                 |
| 4      | GO:0000166; nucleotide binding; molecular_function                                           |
| 1      | GO:0002119; nematode larval development; biological_process                                  |
| 7      | GO:0003676; nucleic acid binding; molecular_function                                         |
| 1      | GO:0003677; DNA binding; molecular_function                                                  |
| 1      | GO:0003689; DNA clamp loader activity; molecular_function                                    |
| 2      | GO:0003700; transcription factor activity, sequence-specific DNA binding; molecular_function |
| 1      | GO:0003824; catalytic activity; molecular_function                                           |
| 1      | GO:0004177; aminopeptidase activity; molecular_function                                      |
| 2      | GO:0004222; metalloendopeptidase activity; molecular_function                                |
| 1      | GO:0004252; serine-type endopeptidase activity; molecular_function                           |
| 1      | GO:0004596; peptide alpha-N-acetyltransferase activity; molecular_function                   |
| 2      | GO:0004672; protein kinase activity; molecular_function                                      |
| 1      | GO:0004930; G-protein coupled receptor activity; molecular_function                          |
| 2      | GO:0005230; extracellular ligand-gated ion channel activity; molecular_function              |
| 4      | GO:0005488; binding; molecular_function                                                      |
| 2      | GO:0005515; protein binding; molecular_function                                              |
| 1      | GO:0005516; calmodulin binding; molecular_function                                           |
| 3      | GO:0005524; ATP binding; molecular_function                                                  |
| 7      | GO:0005622; intracellular; cellular_component                                                |
| 2      | GO:0005634; nucleus; cellular_component                                                      |
| 1      | GO:0005663; DNA replication factor C complex; cellular_component                             |
| 2      | GO:0005667; transcription factor complex; cellular_component                                 |
| 3      | GO:0005737; cytoplasm; cellular_component                                                    |
| 1      | GO:0005739; mitochondrion; cellular_component                                                |
| 1      | GO:0005789; endoplasmic reticulum membrane; cellular_component                               |
| 1      | GO:0005794; Golgi apparatus; cellular_component                                              |
| 1      | GO:0005829; cytosol; cellular_component                                                      |
| 1      | GO:0005886; plasma membrane; cellular_component                                              |
| 1      | GO:0005980; glycogen catabolic process; biological_process                                   |
| 1      | GO:0006006; glucose metabolic process; biological_process                                    |
| 6      | GO:0006139; nucleobase-containing compound metabolic process; biological_process             |
| 1      | GO:0006260; DNA replication; biological_process                                              |
| 2      | GO:0006468; protein phosphorylation; biological_process                                      |
| 4      | GO:0006508; proteolysis; biological_process                                                  |
| 2      | GO:0006811; ion transport; biological_process                                                |
| 1      | GO:0006812; cation transport; biological_process                                             |
| 1      | GO:0007165; signal transduction; biological_process                                          |
| 4      | GO:0007186; G-protein coupled receptor signaling pathway; biological_process                 |
| 2      | GO:0008152; metabolic process; biological_process                                            |
| 1      | GO:0008234; cysteine-type peptidase activity; molecular_function                             |
| 2      | GO:0008270; zinc ion binding; molecular_function                                             |
| 6      | GO:0008408; 3'-5' exonuclease activity; molecular_function                                   |
| 1      | GO:0009792; embryo development ending in birth or egg hatching; biological_process           |
| 1      | GO:0009952; anterior/posterior pattern specification; biological_process                     |

Supplementary Table 3

1 GO:0015031; protein transport; biological\_process  
7 GO:0015074; DNA integration; biological\_process  
1 GO:0015629; actin cytoskeleton; cellular\_component  
3 GO:0016020; membrane; cellular\_component  
7 GO:0016021; integral component of membrane; cellular\_component  
1 GO:0016491; oxidoreductase activity; molecular\_function  
1 GO:0016616; oxidoreductase, CH-OH group of donors, NAD or NADP acceptor; molecular\_function  
1 GO:0016740; transferase activity; molecular\_function  
4 GO:0016787; hydrolase activity; molecular\_function  
1 GO:0018149; peptide cross-linking; biological\_process  
1 GO:0019904; protein domain specific binding; molecular\_function  
1 GO:0021570; rhombomere 4 development; biological\_process  
1 GO:0021571; rhombomere 5 development; biological\_process  
1 GO:0021612; facial nerve structural organization; biological\_process  
1 GO:0021754; facial nucleus development; biological\_process  
1 GO:0022857; transmembrane transporter activity; molecular\_function  
1 GO:0030145; manganese ion binding; molecular\_function  
1 GO:0040007; growth; biological\_process  
1 GO:0042575; DNA polymerase complex; cellular\_component  
1 GO:0042967; acyl-carrier-protein biosynthetic process; biological\_process  
2 GO:0043565; sequence-specific DNA binding; molecular\_function  
1 GO:0045944; positive regulation of transcription from RNA polymerase II promoter; biological\_process  
1 GO:0046872; metal ion binding; molecular\_function  
1 GO:0046983; protein dimerization activity; molecular\_function  
1 GO:0048646; anatomical structure formation involved in morphogenesis; biological\_process  
1 GO:0048704; embryonic skeletal system morphogenesis; biological\_process  
1 GO:0070584; mitochondrion morphogenesis; biological\_process

50                      50

Supplementary Table 4

| GO term    | N obs | N exp | FT pvalue | FT odds | FT q (BH) |
|------------|-------|-------|-----------|---------|-----------|
| GO:0006281 | 639   | 18    | 1.45E-05  | 3.39    | 1.23E-02  |
| GO:0090305 | 331   | 15    | 2.49E-07  | 5.54    | 2.16E-04  |
| GO:0006302 | 197   | 14    | 2.31E-09  | 8.94    | 2.02E-06  |
| GO:0070531 | 40    | 10    | 1.34E-12  | 38.89   | 1.18E-09  |
| GO:0010212 | 78    | 9     | 2.53E-08  | 15.21   | 2.21E-05  |
| GO:0071897 | 119   | 9     | 9.82E-07  | 9.54    | 8.42E-04  |
| GO:0005694 | 145   | 8     | 3.93E-05  | 6.81    | 3.31E-02  |
| GO:0006303 | 72    | 7     | 2.96E-06  | 12.55   | 2.53E-03  |
| GO:1903874 | 8     | 7     | 2.58E-14  | 836.47  | 2.28E-11  |
| GO:0003887 | 64    | 6     | 1.88E-05  | 12.05   | 1.59E-02  |
| GO:0009008 | 10    | 6     | 7.80E-11  | 174.61  | 6.84E-08  |
| GO:0010039 | 26    | 6     | 7.61E-08  | 34.96   | 6.63E-05  |
| GO:0015093 | 8     | 6     | 1.06E-11  | 348.61  | 9.27E-09  |
| GO:0031572 | 32    | 6     | 2.87E-07  | 26.87   | 2.49E-04  |
| GO:0045739 | 52    | 6     | 5.57E-06  | 15.20   | 4.74E-03  |
| GO:0005720 | 25    | 5     | 2.07E-06  | 29.13   | 1.77E-03  |
| GO:0006306 | 30    | 5     | 5.36E-06  | 23.29   | 4.57E-03  |
| GO:0006307 | 27    | 5     | 3.10E-06  | 26.46   | 2.65E-03  |

Supplemental Table 5

| Protein (uniprot id)  | pval DNMT1 | pval DNMT3 |
|-----------------------|------------|------------|
| sp P29372 3MG_HUMAN   | 7.18E-09   | 4.31E-07   |
| sp Q9Y312 AAR2_HUMAN  | 3.43E-20   | 4.16E-02   |
| sp Q96113 ABHD8_HUMAN | 1.11E-09   | 4.60E-05   |
| sp Q6UXC1 AEGP_HUMAN  | 5.90E-10   | 4.04E-08   |
| sp Q6NS38 ALKB2_HUMAN | 3.25E-07   | 3.15E-05   |
| sp Q6AI12 ANR40_HUMAN | 1.51E-08   | 2.99E-07   |
| sp A1IGU5 ARH37_HUMAN | 2.41E-08   | 8.00E-06   |
| sp Q9NR81 ARHG3_HUMAN | 6.40E-10   | 5.24E-09   |
| sp Q7Z628 ARHG8_HUMAN | 6.40E-10   | 5.24E-09   |
| sp P15336 ATF2_HUMAN  | 2.64E-13   | 4.04E-08   |
| sp P17544 ATF7_HUMAN  | 2.68E-11   | 2.99E-07   |
| sp Q99933 BAG1_HUMAN  | 1.28E-07   | 7.58E-05   |
| sp Q9NQY0 BIN3_HUMAN  | 1.19E-09   | 1.71E-05   |
| sp P38398 BRCA1_HUMAN | 1.28E-07   | 1.31E-03   |
| sp P46736 BRCC3_HUMAN | 1.12E-07   | 1.05E-11   |
| sp Q14201 BTG3_HUMAN  | 1.11E-09   | 1.71E-06   |
| sp Q9NY30 BTG4_HUMAN  | 2.29E-07   | 1.71E-06   |
| sp Q2TBE0 C19L2_HUMAN | 3.90E-20   | 4.76E-02   |
| sp O75828 CBR3_HUMAN  | 5.33E-07   | 2.20E-09   |
| sp Q96GN5 CDA7L_HUMAN | 1.84E-07   | 1.11E-04   |
| sp Q9BWT1 CDCA7_HUMAN | 2.23E-08   | 5.99E-05   |
| sp Q8N960 CE120_HUMAN | 2.41E-08   | 8.00E-06   |
| sp Q5TB80 CE162_HUMAN | 5.79E-07   | 1.61E-04   |
| sp O15078 CE290_HUMAN | 2.41E-08   | 1.43E-03   |
| sp A5D8W1 CFA69_HUMAN | 2.81E-08   | 4.27E-06   |
| sp Q5TON1 CFA70_HUMAN | 3.25E-07   | 3.15E-05   |
| sp Q9BRQ4 CK070_HUMAN | 1.51E-08   | 1.18E-05   |
| sp Q9H078 CLPB_HUMAN  | 2.71E-08   | 6.76E-11   |
| sp Q8IY22 CMIP_HUMAN  | 1.51E-08   | 2.99E-07   |
| sp Q96F85 CNRP1_HUMAN | 1.28E-07   | 1.31E-03   |
| sp Q9UBI1 COMD3_HUMAN | 2.77E-07   | 1.86E-04   |
| sp Q9NX08 COMD8_HUMAN | 1.28E-07   | 7.58E-05   |
| sp Q68DL7 CR063_HUMAN | 1.83E-07   | 5.04E-05   |
| sp Q14999 CUL7_HUMAN  | 2.23E-08   | 5.99E-05   |
| sp Q96SD1 DCR1C_HUMAN | 3.86E-07   | 6.69E-07   |
| sp Q5TB30 DEP1A_HUMAN | 2.77E-07   | 1.86E-04   |
| sp Q8WUY9 DEP1B_HUMAN | 2.77E-07   | 1.86E-04   |
| sp O14521 DHSD_HUMAN  | 3.56E-07   | 2.78E-03   |
| sp Q9UBC3 DNM3B_HUMAN | 0.00E+00   | 2.99E-07   |
| sp Q9UJW3 DNM3L_HUMAN | 1.30E-15   | 4.27E-06   |
| sp Q6XZF7 DNMBP_HUMAN | 1.96E-08   | 2.13E-04   |
| sp P26358 DNMT1_HUMAN | 2.99E-07   | 1.00E+00   |
| sp P06746 DPOLB_HUMAN | 1.96E-08   | 3.18E-10   |
| sp Q9UGP5 DPOLL_HUMAN | 1.06E-10   | 6.54E-10   |
| sp Q9NP87 DPOLM_HUMAN | 7.18E-09   | 4.31E-07   |

Supplemental Table 5

|                       |          |          |
|-----------------------|----------|----------|
| sp Q6XUX3 DUSTY_HUMAN | 3.25E-07 | 4.99E-07 |
| sp Q0PNE2 ELP6_HUMAN  | 2.77E-07 | 2.09E-03 |
| sp Q96AY2 EME1_HUMAN  | 2.54E-09 | 1.54E-05 |
| sp Q8N8Q3 ENDOV_HUMAN | 5.22E-07 | 2.07E-03 |
| sp Q96EK7 F120B_HUMAN | 2.29E-07 | 1.71E-06 |
| sp Q8WW52 F151A_HUMAN | 4.87E-20 | 3.68E-02 |
| sp Q9GZU8 F192A_HUMAN | 2.54E-20 | 4.74E-02 |
| sp Q96BQ1 FAM3D_HUMAN | 1.79E-20 | 4.46E-02 |
| sp O94952 FBX21_HUMAN | 3.25E-07 | 3.15E-05 |
| sp Q8TB52 FBX30_HUMAN | 4.87E-07 | 1.49E-03 |
| sp Q9UH90 FBX40_HUMAN | 3.25E-07 | 3.29E-03 |
| sp Q5MNV8 FBX47_HUMAN | 2.77E-07 | 6.55E-06 |
| sp Q9BRP7 FDXA1_HUMAN | 3.25E-07 | 7.24E-09 |
| sp Q9UHY8 FEZ2_HUMAN  | 6.71E-20 | 1.43E-02 |
| sp Q6ZNL6 FGD5_HUMAN  | 2.71E-08 | 4.57E-04 |
| sp Q6MZW2 FSTL4_HUMAN | 2.20E-10 | 5.66E-08 |
| sp Q8N475 FSTL5_HUMAN | 2.20E-10 | 5.66E-08 |
| sp O95954 FTCD_HUMAN  | 3.43E-08 | 3.62E-05 |
| sp Q96A11 G3ST3_HUMAN | 5.22E-07 | 4.91E-07 |
| sp Q2TAP0 GOG7B_HUMAN | 2.22E-20 | 4.92E-02 |
| sp Q86X24 HORM1_HUMAN | 4.51E-09 | 4.70E-03 |
| sp Q8N7B1 HORM2_HUMAN | 2.23E-08 | 5.92E-03 |
| sp O43301 HS12A_HUMAN | 2.81E-08 | 4.27E-06 |
| sp Q96MM6 HS12B_HUMAN | 2.81E-08 | 4.27E-06 |
| sp Q16270 IBP7_HUMAN  | 2.48E-13 | 1.71E-05 |
| sp Q8WX77 IBPL1_HUMAN | 1.28E-07 | 1.31E-03 |
| sp Q53TQ3 IN80D_HUMAN | 2.81E-08 | 1.07E-04 |
| sp Q969R8 ITFG2_HUMAN | 5.90E-10 | 5.70E-05 |
| sp Q13572 ITPK1_HUMAN | 5.33E-07 | 3.13E-12 |
| sp Q7Z7F0 K0907_HUMAN | 6.32E-07 | 2.52E-04 |
| sp Q9P260 K1468_HUMAN | 5.07E-07 | 2.73E-10 |
| sp Q96I82 KAZD1_HUMAN | 3.66E-11 | 4.27E-06 |
| sp Q9P2K6 KLH42_HUMAN | 2.23E-08 | 8.62E-04 |
| sp Q9Y664 KPTN_HUMAN  | 5.48E-13 | 3.95E-06 |
| sp Q9UHB6 LIMA1_HUMAN | 2.77E-07 | 1.86E-04 |
| sp Q9BT23 LIMD2_HUMAN | 1.11E-09 | 2.11E-08 |
| sp Q96E66 LRC51_HUMAN | 1.28E-07 | 2.51E-06 |
| sp Q9HCI5 MAGE1_HUMAN | 2.62E-07 | 1.58E-03 |
| sp Q9HAY2 MAGF1_HUMAN | 5.32E-13 | 3.15E-05 |
| sp Q9UNF1 MAGD2_HUMAN | 8.27E-07 | 8.69E-03 |
| sp Q9UJ55 MAGL2_HUMAN | 4.47E-07 | 2.58E-05 |
| sp Q9NZL9 MAT2B_HUMAN | 2.77E-07 | 2.09E-03 |
| sp Q14676 MDC1_HUMAN  | 2.99E-07 | 2.00E-08 |
| sp Q9H8H3 MET7A_HUMAN | 2.23E-08 | 5.99E-05 |
| sp Q86V88 MGDP1_HUMAN | 3.27E-09 | 3.43E-05 |
| sp Q6ZRQ5 MMS22_HUMAN | 3.25E-07 | 3.29E-03 |

Supplemental Table 5

|                       |          |          |
|-----------------------|----------|----------|
| sp P98088 MUC5A_HUMAN | 3.84E-20 | 3.20E-02 |
| sp P50539 MXI1_HUMAN  | 3.25E-07 | 7.24E-09 |
| sp Q53F19 NCBP3_HUMAN | 6.18E-07 | 2.26E-02 |
| sp Q14934 NFAC4_HUMAN | 0.00E+00 | 3.86E-02 |
| sp Q6KC79 NIPBL_HUMAN | 2.50E-20 | 4.16E-02 |
| sp O15226 NKRF_HUMAN  | 2.29E-07 | 1.71E-06 |
| sp Q9NP64 NO40_HUMAN  | 8.36E-08 | 3.55E-05 |
| sp Q96MY1 NOL4L_HUMAN | 2.97E-20 | 3.51E-02 |
| sp P49281 NRAM2_HUMAN | 5.71E-20 | 4.69E-02 |
| sp Q9BRQ3 NUD22_HUMAN | 6.34E-07 | 3.37E-04 |
| sp Q6N063 OGFD2_HUMAN | 1.83E-07 | 9.72E-05 |
| sp Q96E52 OMA1_HUMAN  | 1.11E-09 | 1.71E-06 |
| sp Q6GTS8 P20D1_HUMAN | 2.81E-08 | 1.07E-04 |
| sp Q8IVL6 P3H3_HUMAN  | 2.41E-08 | 8.00E-06 |
| sp Q9UKK3 PARP4_HUMAN | 1.28E-07 | 2.51E-06 |
| sp Q9UHG3 PCYOX_HUMAN | 1.12E-11 | 2.11E-04 |
| sp Q8NBM8 PCYXL_HUMAN | 1.12E-11 | 2.11E-04 |
| sp Q9NTI5 PDS5B_HUMAN | 2.50E-20 | 2.02E-02 |
| sp Q504Y2 PKDCC_HUMAN | 2.35E-08 | 6.39E-03 |
| sp Q9NS91 RAD18_HUMAN | 1.30E-15 | 4.27E-06 |
| sp P78332 RBM6_HUMAN  | 1.28E-07 | 2.51E-06 |
| sp Q9NWF9 RN216_HUMAN | 2.41E-08 | 9.00E-07 |
| sp Q5VYX0 RNLS_HUMAN  | 2.77E-07 | 1.86E-04 |
| sp Q9BU20 RSG1_HUMAN  | 3.25E-07 | 3.15E-05 |
| sp Q86VV8 RTTN_HUMAN  | 2.41E-08 | 8.00E-06 |
| sp P0CK97 S35E2_HUMAN | 1.28E-07 | 2.51E-06 |
| sp Q7Z769 S35E3_HUMAN | 2.23E-08 | 5.99E-05 |
| sp A6NNN8 S38A8_HUMAN | 1.85E-15 | 2.99E-07 |
| sp Q6UVJ0 SAS6_HUMAN  | 1.28E-07 | 4.04E-08 |
| sp P13866 SC5A1_HUMAN | 7.18E-09 | 1.45E-05 |
| sp P31639 SC5A2_HUMAN | 3.25E-07 | 3.15E-05 |
| sp P53794 SC5A3_HUMAN | 3.25E-07 | 3.15E-05 |
| sp Q8WU76 SCFD2_HUMAN | 7.55E-07 | 3.98E-09 |
| sp Q8NE22 SETD9_HUMAN | 2.81E-08 | 2.78E-03 |
| sp Q16533 SNPC1_HUMAN | 5.22E-07 | 9.28E-06 |
| sp Q5MJ70 SPDYA_HUMAN | 7.67E-07 | 2.76E-04 |
| sp Q8WWL2 SPIR2_HUMAN | 2.62E-20 | 4.02E-02 |
| sp P43307 SSRA_HUMAN  | 2.50E-20 | 4.16E-02 |
| sp P49842 STK19_HUMAN | 3.43E-08 | 1.08E-03 |
| sp Q96EM0 T3HPD_HUMAN | 4.56E-07 | 1.58E-04 |
| sp Q2M2D7 TBC28_HUMAN | 7.55E-07 | 4.31E-07 |
| sp B5MCY1 TDR15_HUMAN | 5.36E-10 | 1.86E-04 |
| sp P04053 TDT_HUMAN   | 1.28E-07 | 2.51E-06 |
| sp Q9H6L2 TM231_HUMAN | 1.96E-08 | 6.09E-05 |
| sp Q9ULQ1 TPC1_HUMAN  | 2.96E-08 | 5.67E-16 |
| sp Q9NSU2 TREX1_HUMAN | 6.43E-20 | 8.71E-03 |

Supplemental Table 5

|                       |          |          |
|-----------------------|----------|----------|
| sp Q12816 TROP_HUMAN  | 4.39E-08 | 1.45E-04 |
| sp O14562 UBFD1_HUMAN | 8.52E-07 | 7.52E-12 |
| sp Q96T88 UHRF1_HUMAN | 1.12E-07 | 0.00E+00 |
| sp Q96PU4 UHRF2_HUMAN | 1.12E-07 | 0.00E+00 |
| sp C4AMC7 WASH3_HUMAN | 2.48E-20 | 2.64E-02 |
| sp O00401 WASL_HUMAN  | 2.57E-20 | 4.77E-02 |
| sp Q96KV7 WDR90_HUMAN | 3.25E-07 | 4.52E-04 |
| sp Q8TEU8 WFKN2_HUMAN | 2.77E-07 | 2.09E-03 |
| sp Q9P2S5 WRP73_HUMAN | 3.25E-07 | 3.15E-05 |
| sp P49750 YLPM1_HUMAN | 0.00E+00 | 4.44E-02 |
| sp P59817 Z280A_HUMAN | 1.28E-07 | 1.31E-03 |

Supplementary Table 6

|                                 | ALKB2/ALKB3 | DNM3A/DNMT3B | DNMT1 |
|---------------------------------|-------------|--------------|-------|
| <i>Amphimedon queenslandica</i> | 1           | 1            | 1     |
| <i>Trichoplax adhaerens</i>     | 0           | 0            | 0     |
| <i>Mnemiopsis leidyi</i>        | 1           | 1            | 1     |
| <i>Nematostella vectensis</i>   | 1           | 1            | 1     |
| <i>Lottia gigantea</i>          | 1           | 1            | 1     |
| <i>Crassostrea gigas</i>        | 1           | 1            | 1     |
| <i>Capitella teleta</i>         | 1           | 1            | 1     |
| <i>Helobdella robusta</i>       | 1           | 1            | 1     |
| <i>Pediculus humanus</i>        | 0           | 0            | 1     |
| <i>Acyrtosiphon pisum</i>       | 1           | 1            | 1     |
| <i>Rhodnius prolixus</i>        | 1           | 0            | 1     |
| <i>Zootermopsis nevadensis</i>  | 1           | 1            | 0     |
| <i>Nasonia vitripennis</i>      | 0           | 1            | 1     |
| <i>Solenopsis invicta</i>       | 0           | 1            | 1     |
| <i>Atta cephalotes</i>          | 0           | 1            | 1     |
| <i>Apis mellifera</i>           | 0           | 1            | 1     |
| <i>Culex quinquefasciatus</i>   | 0           | 0            | 0     |
| <i>Aedes aegypti</i>            | 0           | 0            | 0     |
| <i>Anopheles darlingi</i>       | 0           | 0            | 0     |
| <i>Anopheles gambiae</i>        | 0           | 0            | 0     |
| <i>Drosophila willistoni</i>    | 0           | 0            | 0     |
| <i>Drosophila pseudoobscura</i> | 0           | 0            | 0     |
| <i>Drosophila persimilis</i>    | 0           | 0            | 0     |
| <i>Drosophila ananassae</i>     | 0           | 0            | 0     |
| <i>Drosophila erecta</i>        | 0           | 0            | 0     |
| <i>Drosophila melanogaster</i>  | 0           | 0            | 0     |
| <i>Drosophila sechellia</i>     | 0           | 0            | 0     |
| <i>Drosophila simulans</i>      | 0           | 0            | 0     |
| <i>Drosophila yakuba</i>        | 0           | 0            | 0     |
| <i>Drosophila grimshawi</i>     | 0           | 0            | 0     |
| <i>Drosophila mojavensis</i>    | 0           | 0            | 0     |
| <i>Drosophila virilis</i>       | 0           | 0            | 0     |
| <i>Megaselia scalaris</i>       | 0           | 0            | 0     |
| <i>Tribolium castaneum</i>      | 1           | 0            | 1     |
| <i>Dendroctonus ponderosae</i>  | 0           | 0            | 0     |
| <i>Melitaea cinxia</i>          | 0           | 0            | 1     |
| <i>Heliconius melpomene</i>     | 0           | 0            | 1     |
| <i>Danaus plexippus</i>         | 1           | 0            | 1     |
| <i>Bombyx mori</i>              | 0           | 0            | 1     |
| <i>Daphnia pulex</i>            | 0           | 1            | 1     |

Supplementary Table 6

|                                      |   |   |   |
|--------------------------------------|---|---|---|
| <i>Paryhale hawaiiensis</i>          | 1 | 1 | 1 |
| <i>Strigamia maritima</i>            | 1 | 1 | 1 |
| <i>Ixodes scapularis</i>             | 0 | 0 | 1 |
| <i>Tetranychus urticae</i>           | 0 | 1 | 1 |
| <i>Hypsibium dujardini</i>           | 0 | 0 | 0 |
| <i>Panagordius varius</i>            | 1 | 1 | 1 |
| <i>Romanomermis culicivorax</i>      | 1 | 1 | 1 |
| <i>Trichinella spiralis</i>          | 1 | 1 | 0 |
| <i>Plectus sambesii</i>              | 1 | 0 | 1 |
| <i>Enoplus brevis</i>                | 0 | 0 | 0 |
| <i>Brugia malayi</i>                 | 0 | 0 | 0 |
| <i>Loa loa</i>                       | 0 | 0 | 0 |
| <i>Onchocerca volvulus</i>           | 0 | 0 | 0 |
| <i>Caenorhabditis brenneri</i>       | 0 | 0 | 0 |
| <i>Caenorhabditis briggsae</i>       | 0 | 0 | 0 |
| <i>Caenorhabditis elegans</i>        | 0 | 0 | 0 |
| <i>Caenorhabditis japonica</i>       | 0 | 0 | 0 |
| <i>Caenorhabditis remanei</i>        | 0 | 0 | 0 |
| <i>Pristionchus pacificus</i>        | 0 | 0 | 0 |
| <i>Schistosoma mansoni</i>           | 0 | 0 | 0 |
| <i>Strongylocentrotus purpuratus</i> | 1 | 1 | 1 |

source

Ensembl

[www.nematodes.org](http://www.nematodes.org)

NCBI

Supplementary Table 7

| Strain name                                | ALKB2/ALKB3 | DNMT3A/DNMT3B | DNMT1 |
|--------------------------------------------|-------------|---------------|-------|
| <i>Acanthamoeba castellanii</i> str. Neff  | 1           | 1             | 1     |
| <i>Albugo candida</i>                      | 0           | 0             | 0     |
| <i>Albugo laibachii</i>                    | 0           | 0             | 0     |
| <i>Angomonas deanei</i>                    | 0           | 0             | 0     |
| <i>Aphanomyces astaci</i>                  | 0           | 0             | 0     |
| <i>Aphanomyces invadans</i>                | 0           | 0             | 0     |
| <i>Aureococcus anophagefferens</i>         | 0           | 0             | 0     |
| <i>Babesia bigemina</i>                    | 0           | 0             | 0     |
| <i>Babesia bovis</i>                       | 0           | 0             | 0     |
| <i>Babesia microti</i> strain RI           | 0           | 0             | 0     |
| <i>Bigelowiella natans</i>                 | 1           | 0             | 0     |
| <i>Bigelowiella natans</i> (GCA_000002455) | 0           | 0             | 0     |
| <i>Blastocystis hominis</i>                | 0           | 0             | 0     |
| <i>Bodo saltans</i>                        | 0           | 0             | 0     |
| <i>Capsaspora owczarzaki</i> ATCC 30864    | 1           | 0             | 0     |
| <i>Chroomonas mesostigmatica</i> CCMP1168  | 0           | 0             | 0     |
| <i>Cryptomonas paramecium</i>              | 0           | 0             | 0     |
| <i>Cryptosporidium muris</i> RN66          | 0           | 0             | 0     |
| <i>Cryptosporidium parvum</i>              | 0           | 0             | 0     |
| <i>Cryptosporidium parvum</i> Iowa II      | 0           | 0             | 0     |
| <i>Dictyostelium discoideum</i>            | 0           | 0             | 0     |
| <i>Dictyostelium fasciculatum</i>          | 1           | 0             | 0     |
| <i>Dictyostelium lacteum</i>               | 0           | 0             | 0     |
| <i>Dictyostelium purpureum</i>             | 0           | 0             | 0     |
| <i>Eimeria acervulina</i>                  | 0           | 0             | 0     |
| <i>Eimeria brunetti</i>                    | 0           | 0             | 0     |
| <i>Eimeria maxima</i>                      | 0           | 0             | 0     |
| <i>Eimeria mitis</i>                       | 0           | 0             | 0     |
| <i>Eimeria necatrix</i>                    | 0           | 0             | 0     |
| <i>Eimeria praecox</i>                     | 0           | 0             | 0     |
| <i>Eimeria tenella</i>                     | 0           | 0             | 0     |
| <i>Eimeria tenella</i> (GCA_000499545)     | 0           | 0             | 0     |
| <i>Emiliana huxleyi</i>                    | 1           | 0             | 1     |
| <i>Entamoeba dispar</i> SAW760             | 0           | 0             | 0     |
| <i>Entamoeba histolytica</i>               | 0           | 0             | 0     |
| <i>Entamoeba histolytica</i> HM-1:IMSS-A   | 0           | 0             | 0     |
| <i>Entamoeba histolytica</i> HM-1:IMSS-B   | 0           | 0             | 0     |
| <i>Entamoeba histolytica</i> HM-3:IMSS     | 0           | 0             | 0     |
| <i>Entamoeba histolytica</i> KU27          | 0           | 0             | 0     |
| <i>Entamoeba invadens</i> IP1              | 0           | 0             | 0     |
| <i>Entamoeba nuttalli</i> P19              | 0           | 0             | 0     |
| <i>Fonticula alba</i>                      | 0           | 0             | 0     |
| <i>Giardia intestinalis</i>                | 0           | 0             | 0     |

Supplementary Table 7

|                                                 |   |   |   |
|-------------------------------------------------|---|---|---|
| <i>Giardia intestinalis</i> (GCA_000498715)     | 0 | 0 | 0 |
| <i>Giardia intestinalis</i> ATCC 50581          | 0 | 0 | 0 |
| <i>Giardia intestinalis</i> assemblage B        | 0 | 0 | 0 |
| <i>Giardia lamblia</i>                          | 0 | 0 | 0 |
| <i>Giardia lamblia</i> P15                      | 0 | 0 | 0 |
| <i>Gregarina niphandrodes</i>                   | 0 | 0 | 0 |
| <i>Guillardia theta</i> CCMP2712                | 0 | 0 | 0 |
| <i>Hammondia hammondi</i>                       | 0 | 0 | 0 |
| <i>Hyaloperonospora arabidopsidis</i>           | 0 | 0 | 0 |
| <i>Ichthyophthirius multifiliis</i>             | 0 | 0 | 0 |
| <i>Leishmania braziliensis</i> MHOM/BR/75/M2904 | 0 | 0 | 0 |
| <i>Leishmania donovani</i> BPK282A1             | 0 | 0 | 0 |
| <i>Leishmania infantum</i> JPCM5                | 0 | 0 | 0 |
| <i>Leishmania major</i>                         | 0 | 0 | 0 |
| <i>Leishmania mexicana</i> MHOM/GT/2001/U1103   | 0 | 0 | 0 |
| <i>Leptomonas pyrrocoris</i>                    | 0 | 0 | 0 |
| <i>Leptomonas seymouri</i>                      | 0 | 0 | 0 |
| <i>Lotharella oceanica</i>                      | 0 | 0 | 0 |
| <i>Monosiga brevicollis</i> MX1                 | 1 | 0 | 0 |
| <i>Naegleria gruberi</i>                        | 1 | 0 | 1 |
| <i>Nannochloropsis gaditana</i>                 | 0 | 0 | 0 |
| <i>Nannochloropsis gaditana</i> CCMP526         | 0 | 0 | 0 |
| <i>Oxytricha trifallax</i>                      | 0 | 0 | 0 |
| <i>Oxytricha trifallax</i> (GCA_000295675)      | 0 | 0 | 0 |
| <i>Paramecium tetraurelia</i>                   | 0 | 0 | 0 |
| <i>Paulinella chromatophora</i>                 | 0 | 0 | 0 |
| <i>Perkinsela</i> sp. CCAP 1560/4               | 0 | 0 | 0 |
| <i>Perkinsus marinus</i> ATCC 50983             | 1 | 0 | 0 |
| <i>Phaeodactylum tricornutum</i>                | 1 | 0 | 0 |
| <i>Phytomonas</i> sp. isolate EM1               | 0 | 0 | 0 |
| <i>Phytomonas</i> sp. isolate Hart1             | 0 | 0 | 0 |
| <i>Phytophthora infestans</i>                   | 1 | 0 | 0 |
| <i>Phytophthora kernoviae</i>                   | 0 | 0 | 0 |
| <i>Phytophthora lateralis</i>                   | 0 | 0 | 0 |
| <i>Phytophthora nicotianae</i>                  | 0 | 0 | 0 |
| <i>Phytophthora nicotianae</i> (GCA_001482985)  | 0 | 0 | 0 |
| <i>Phytophthora parasitica</i>                  | 1 | 0 | 0 |
| <i>Phytophthora parasitica</i> (GCA_000509465)  | 1 | 0 | 0 |
| <i>Phytophthora parasitica</i> (GCA_000509485)  | 1 | 0 | 0 |
| <i>Phytophthora parasitica</i> (GCA_000509505)  | 1 | 0 | 0 |
| <i>Phytophthora parasitica</i> (GCA_000509525)  | 1 | 0 | 0 |
| <i>Phytophthora parasitica</i> CJ01A1           | 1 | 0 | 0 |
| <i>Phytophthora parasitica</i> INRA-310         | 1 | 0 | 0 |
| <i>Phytophthora parasitica</i> P10297           | 1 | 0 | 0 |

Supplementary Table 7

|                                               |   |   |   |
|-----------------------------------------------|---|---|---|
| Phytophthora parasitica P1976                 | 1 | 0 | 0 |
| Phytophthora ramorum                          | 0 | 0 | 0 |
| Phytophthora sojae                            | 0 | 0 | 0 |
| Plasmodiophora brassicae                      | 1 | 0 | 0 |
| Plasmodium berghei                            | 0 | 0 | 0 |
| Plasmodium berghei (GCA_000005395)            | 0 | 0 | 0 |
| Plasmodium berghei (GCA_900044335)            | 0 | 0 | 0 |
| Plasmodium chabaudi                           | 0 | 0 | 0 |
| Plasmodium chabaudi chabaudi                  | 0 | 0 | 0 |
| Plasmodium cynomolgi strain B                 | 0 | 0 | 0 |
| Plasmodium falciparum                         | 0 | 0 | 0 |
| Plasmodium falciparum 7G8                     | 0 | 0 | 0 |
| Plasmodium falciparum CAMP/Malaysia           | 0 | 0 | 0 |
| Plasmodium falciparum Dd2                     | 0 | 0 | 0 |
| Plasmodium falciparum FCH/4                   | 0 | 0 | 0 |
| Plasmodium falciparum HB3                     | 0 | 0 | 0 |
| Plasmodium falciparum IGH-CR14                | 0 | 0 | 0 |
| Plasmodium falciparum MaliPS096_E11           | 0 | 0 | 0 |
| Plasmodium falciparum NF135/5.C10             | 0 | 0 | 0 |
| Plasmodium falciparum NF54                    | 0 | 0 | 0 |
| Plasmodium falciparum Palo Alto/Uganda        | 0 | 0 | 0 |
| Plasmodium falciparum RAJ116                  | 0 | 0 | 0 |
| Plasmodium falciparum Santa Lucia             | 0 | 0 | 0 |
| Plasmodium falciparum Tanzania (2000708)      | 0 | 0 | 0 |
| Plasmodium falciparum UGT5.1                  | 0 | 0 | 0 |
| Plasmodium falciparum Vietnam Oak-Knoll (FVO) | 0 | 0 | 0 |
| Plasmodium fragile                            | 0 | 0 | 0 |
| Plasmodium gaboni                             | 0 | 0 | 0 |
| Plasmodium inui San Antonio 1                 | 0 | 0 | 0 |
| Plasmodium knowlesi                           | 0 | 0 | 0 |
| Plasmodium reichenowi                         | 0 | 0 | 0 |
| Plasmodium reichenowi (GCA_001601855)         | 0 | 0 | 0 |
| Plasmodium vinckei petteri                    | 0 | 0 | 0 |
| Plasmodium vinckei vinckei                    | 0 | 0 | 0 |
| Plasmodium vivax                              | 0 | 0 | 0 |
| Plasmodium vivax Brazil I                     | 0 | 0 | 0 |
| Plasmodium vivax India VII                    | 0 | 0 | 0 |
| Plasmodium vivax Mauritania I                 | 0 | 0 | 0 |
| Plasmodium vivax North Korean                 | 0 | 0 | 0 |
| Plasmodium yoelii                             | 0 | 0 | 0 |
| Plasmodium yoelii (GCA_900002395)             | 0 | 0 | 0 |
| Plasmodium yoelii 17X                         | 0 | 0 | 0 |
| Plasmodium yoelii yoelii                      | 0 | 0 | 0 |
| Plasmopara halstedii                          | 1 | 0 | 0 |

Supplementary Table 7

|                                             |   |   |   |
|---------------------------------------------|---|---|---|
| <i>Polysphondylium pallidum</i> PN500       | 1 | 0 | 0 |
| <i>Pseudocohnilembus persalinus</i>         | 1 | 0 | 0 |
| <i>Pythium aphanidermatum</i>               | 1 | 0 | 0 |
| <i>Pythium arrhenomanes</i>                 | 0 | 0 | 0 |
| <i>Pythium irregulare</i>                   | 1 | 0 | 0 |
| <i>Pythium iwayamai</i>                     | 1 | 0 | 0 |
| <i>Pythium ultimum</i>                      | 1 | 0 | 0 |
| <i>Pythium vexans</i>                       | 1 | 0 | 0 |
| <i>Reticulomyxa filosa</i>                  | 1 | 0 | 0 |
| <i>Salpingoeca rosetta</i>                  | 1 | 0 | 0 |
| <i>Saprolegnia diclina</i> VS20             | 0 | 0 | 0 |
| <i>Saprolegnia parasitica</i> CBS 223.65    | 0 | 0 | 0 |
| <i>Sphaeroforma arctica</i> JP610           | 0 | 0 | 0 |
| <i>Spironucleus salmonicida</i>             | 0 | 0 | 0 |
| <i>Strigomonas culicis</i>                  | 0 | 0 | 0 |
| <i>Stylonychia lemnae</i>                   | 0 | 0 | 0 |
| <i>Tetrahymena thermophila</i>              | 0 | 0 | 0 |
| <i>Thalassiosira oceanica</i>               | 1 | 0 | 0 |
| <i>Thalassiosira oceanica</i> CCMP1005      | 0 | 0 | 0 |
| <i>Thalassiosira pseudonana</i>             | 1 | 0 | 0 |
| <i>Thecamonas trahens</i> ATCC 50062        | 0 | 0 | 0 |
| <i>Theileria annulata</i>                   | 0 | 0 | 0 |
| <i>Theileria equi</i> strain WA             | 0 | 0 | 0 |
| <i>Theileria orientalis</i> strain Shintoku | 0 | 0 | 0 |
| <i>Theileria parva</i>                      | 0 | 0 | 0 |
| <i>Toxoplasma gondii</i>                    | 0 | 0 | 0 |
| <i>Toxoplasma gondii</i> ARI                | 0 | 0 | 0 |
| <i>Toxoplasma gondii</i> FOU                | 0 | 0 | 0 |
| <i>Toxoplasma gondii</i> GAB2-2007-GAL-DOM2 | 0 | 0 | 0 |
| <i>Toxoplasma gondii</i> GT1                | 0 | 0 | 0 |
| <i>Toxoplasma gondii</i> MAS                | 0 | 0 | 0 |
| <i>Toxoplasma gondii</i> RUB                | 0 | 0 | 0 |
| <i>Toxoplasma gondii</i> TgCatPRC2          | 0 | 0 | 0 |
| <i>Toxoplasma gondii</i> VAND               | 0 | 0 | 0 |
| <i>Toxoplasma gondii</i> VEG                | 0 | 0 | 0 |
| <i>Toxoplasma gondii</i> p89                | 0 | 0 | 0 |
| <i>Trichomonas vaginalis</i> G3             | 0 | 0 | 0 |
| <i>Trypanosoma brucei</i>                   | 0 | 0 | 0 |
| <i>Trypanosoma cruzi</i>                    | 0 | 0 | 0 |
| <i>Trypanosoma cruzi</i> (GCA_000188675)    | 0 | 0 | 0 |
| <i>Trypanosoma cruzi</i> Dm28c              | 0 | 0 | 0 |
| <i>Trypanosoma cruzi</i> marinkellei        | 0 | 0 | 0 |
| <i>Trypanosoma rangeli</i> SC58             | 0 | 0 | 0 |
| <i>Vitrella brassicaformis</i> CCMP3155     | 1 | 0 | 1 |

Supplementary Table 8

| Strain name                                    | ALKB2/ALKB3 | DNMT1 |
|------------------------------------------------|-------------|-------|
| <i>Eremothecium cymbalariae</i> dbvpg 7215     | 1           | 1     |
| <i>Coprinopsis cinerea</i> okayama7 130        | 1           | 1     |
| <i>Allomyces macrogynus</i> atcc 38327         | 0           | 1     |
| <i>Baudoinia panamericana</i> uamh 10762       | 1           | 1     |
| <i>Spizellomyces punctatus</i> daom br117      | 1           | 0     |
| <i>Gonapodya prolifera</i> jel478              | 1           | 1     |
| <i>Rozella allomycis</i> csf55                 | 0           | 0     |
| <i>Acidomyces richmondensis</i> bfw            | 1           | 0     |
| <i>Diplodia seriata</i>                        | 1           | 0     |
| <i>Macrophomina phaseolina</i> ms6             | 1           | 1     |
| <i>Neofusicoccum parvum</i> ucrnp2             | 1           | 0     |
| <i>Verruconis gallopava</i>                    | 1           | 1     |
| <i>Pseudocercospora fijiensis</i> cirad86      | 1           | 1     |
| <i>Dothistroma septosporum</i>                 | 1           | 1     |
| <i>Mycosphaerella eumusae</i>                  | 1           | 0     |
| <i>Pseudocercospora musae</i>                  | 1           | 1     |
| <i>Sphaerulina musiva</i> so2202               | 1           | 1     |
| <i>Zymoseptoria tritici</i>                    | 1           | 0     |
| <i>Zymoseptoria brevis</i>                     | 1           | 1     |
| <i>Aureobasidium namibiae</i> cbs 147 97       | 1           | 1     |
| <i>Aureobasidium pullulans</i> exf 150         | 1           | 1     |
| <i>Aureobasidium subglaciale</i> exf 2481      | 1           | 1     |
| <i>Batrachochytrium dendrobatidis</i> jam81    | 1           | 1     |
| <i>Leptosphaeria maculans</i>                  | 1           | 1     |
| <i>Phaeosphaeria nodorum</i>                   | 1           | 1     |
| <i>Bipolaris maydis</i> c5                     | 1           | 1     |
| <i>Bipolaris maydis</i> atcc 48331             | 1           | 1     |
| <i>Bipolaris oryzae</i> atcc 44560             | 1           | 1     |
| <i>Bipolaris sorokiniana</i> nd90pr            | 1           | 1     |
| <i>Bipolaris victoriae</i> fi3                 | 1           | 1     |
| <i>Bipolaris zeicola</i> 26 r 13               | 1           | 1     |
| <i>Pyrenophora teres</i>                       | 1           | 1     |
| <i>Pyrenophora triticirepentis</i>             | 1           | 1     |
| <i>Setosphaeria turcica</i> et28a              | 1           | 1     |
| <i>Stemphylium lycopersici</i>                 | 1           | 1     |
| <i>Cyphellophora europaea</i> cbs 101466       | 1           | 1     |
| <i>Capronia coronata</i> cbs 617 96            | 1           | 1     |
| <i>Capronia epimyces</i> cbs 606 96            | 1           | 1     |
| <i>Capronia semi immersa</i>                   | 1           | 1     |
| <i>Cladophialophora bantiana</i> cbs 173 52    | 1           | 1     |
| <i>Cladophialophora carrionii</i> cbs 160 54   | 1           | 1     |
| <i>Cladophialophora psammophila</i> cbs 110553 | 1           | 1     |
| <i>Cladophialophora yegresii</i> cbs 114405    | 1           | 1     |

Supplementary Table 8

|                                             |   |   |
|---------------------------------------------|---|---|
| <i>Cladophialophora immunda</i>             | 1 | 1 |
| <i>Coniosporium apollinis</i> cbs 100218    | 1 | 1 |
| <i>Exophiala aquamarina</i> cbs 119918      | 1 | 1 |
| <i>Exophiala dermatitidis</i> nih ut8656    | 1 | 1 |
| <i>Exophiala mesophila</i>                  | 1 | 0 |
| <i>Exophiala oligosperma</i>                | 1 | 1 |
| <i>Exophiala sideris</i>                    | 1 | 1 |
| <i>Exophiala spinifera</i>                  | 1 | 1 |
| <i>Exophiala xenobiotica</i>                | 1 | 1 |
| <i>Fonsecaea multimorphosa</i> cbs 102226   | 1 | 1 |
| <i>Fonsecaea pedrosoi</i> cbs 271 37        | 1 | 1 |
| <i>Phialophora attae</i>                    | 1 | 1 |
| <i>Rhinocladiella mackenziei</i> cbs 650 93 | 1 | 1 |
| <i>Phaeomoniella chlamydospora</i>          | 1 | 0 |
| <i>Endocarpon pusillum</i> z07020           | 1 | 1 |
| <i>Aspergillus clavatus</i>                 | 1 | 1 |
| <i>Aspergillus flavus</i>                   | 1 | 1 |
| <i>Aspergillus flavus</i> af70              | 1 | 1 |
| <i>Aspergillus fumigatus</i>                | 1 | 1 |
| <i>Aspergillus fumigatus</i> z5             | 1 | 1 |
| <i>Aspergillus fumigatus</i> a1163          | 1 | 1 |
| <i>Aspergillus lentulus</i>                 | 1 | 1 |
| <i>Aspergillus nidulans</i>                 | 1 | 1 |
| <i>Aspergillus niger</i> atcc 1015          | 1 | 1 |
| <i>Aspergillus nomius</i> nrri 13137        | 1 | 1 |
| <i>Aspergillus ochraceoroseus</i>           | 1 | 1 |
| <i>Aspergillus oryzae</i>                   | 1 | 1 |
| <i>Aspergillus oryzae</i> 3 042             | 1 | 1 |
| <i>Aspergillus parasiticus</i> su 1         | 1 | 1 |
| <i>Aspergillus rambellii</i>                | 1 | 1 |
| <i>Aspergillus terreus</i>                  | 1 | 1 |
| <i>Aspergillus udagawae</i>                 | 1 | 1 |
| <i>Neosartorya fischeri</i>                 | 1 | 1 |
| <i>Aspergillus calidoustus</i>              | 1 | 1 |
| <i>Aspergillus luchuensis</i>               | 1 | 1 |
| <i>Aspergillus nidulans</i> fgsc a4         | 1 | 1 |
| <i>Aspergillus niger</i>                    | 1 | 1 |
| <i>Aspergillus niger</i> gca 001515345      | 1 | 1 |
| <i>Aspergillus oryzae</i> 100 8             | 1 | 1 |
| <i>Aspergillus ruber</i> cbs 135680         | 1 | 1 |
| <i>Aspergillus ustus</i>                    | 1 | 1 |
| <i>Aureobasidium melanogenum</i> cbs 110374 | 1 | 1 |
| <i>Penicillium rubens</i> wisconsin 54 1255 | 1 | 1 |
| <i>Penicillium chrysogenum</i>              | 1 | 1 |

Supplementary Table 8

|                                            |   |   |
|--------------------------------------------|---|---|
| <i>Penicillium digitatum</i> phi26         | 1 | 1 |
| <i>Penicillium digitatum</i> pd1           | 1 | 1 |
| <i>Penicillium oxalicum</i> 114 2          | 1 | 1 |
| <i>Penicillium roqueforti</i> fm164        | 1 | 1 |
| <i>Penicillium brasilianum</i>             | 1 | 1 |
| <i>Penicillium expansum</i>                | 1 | 1 |
| <i>Penicillium expansum</i> gca 000769745  | 1 | 1 |
| <i>Penicillium expansum</i> gca 000769735  | 1 | 1 |
| <i>Penicillium freii</i>                   | 1 | 1 |
| <i>Penicillium griseofulvum</i>            | 1 | 1 |
| <i>Penicillium italicum</i>                | 1 | 1 |
| <i>Penicillium nordicum</i>                | 1 | 1 |
| <i>Penicillium solitum</i>                 | 1 | 1 |
| <i>Byssosclamyces spectabilis</i> no 5     | 1 | 1 |
| <i>Rasamsonia emersonii</i> cbs 393 64     | 1 | 1 |
| <i>Talaromyces marneffei</i> pm1           | 1 | 1 |
| <i>Talaromyces marneffei</i> atcc 18224    | 1 | 1 |
| <i>Talaromyces stipitatus</i> atcc 10500   | 1 | 1 |
| <i>Talaromyces islandicus</i>              | 1 | 1 |
| <i>Blastomyces dermatitidis</i> er 3       | 1 | 1 |
| <i>Blastomyces dermatitidis</i> atcc 26199 | 1 | 1 |
| <i>Blastomyces dermatitidis</i> atcc 18188 | 1 | 1 |
| <i>Blastomyces gilchristii</i> slh14081    | 1 | 1 |
| <i>Emmonsia crescens</i> uamh 3008         | 1 | 1 |
| <i>Histoplasma capsulatum</i> nam1         | 1 | 1 |
| <i>Histoplasma capsulatum</i> h88          | 1 | 1 |
| <i>Histoplasma capsulatum</i> h143         | 1 | 1 |
| <i>Histoplasma capsulatum</i> g186ar       | 1 | 1 |
| <i>Arthroderma benhamiae</i> cbs 112371    | 1 | 1 |
| <i>Arthroderma otae</i> cbs 113480         | 1 | 1 |
| <i>Microsporum gypseum</i> cbs 118893      | 1 | 1 |
| <i>Trichophyton equinum</i> cbs 127 97     | 1 | 1 |
| <i>Trichophyton interdigitale</i> mr816    | 1 | 1 |
| <i>Trichophyton interdigitale</i> h6       | 1 | 1 |
| <i>Trichophyton rubrum</i> mr850           | 1 | 1 |
| <i>Trichophyton rubrum</i> mr1459          | 1 | 1 |
| <i>Trichophyton rubrum</i> mr1448          | 1 | 1 |
| <i>Trichophyton rubrum</i> d6              | 1 | 1 |
| <i>Trichophyton rubrum</i> cbs 735 88      | 1 | 1 |
| <i>Trichophyton rubrum</i> cbs 289 86      | 1 | 1 |
| <i>Trichophyton rubrum</i> cbs 288 86      | 1 | 1 |
| <i>Trichophyton rubrum</i> cbs 202 88      | 1 | 1 |
| <i>Trichophyton rubrum</i> cbs 118892      | 1 | 1 |
| <i>Trichophyton rubrum</i> cbs 100081      | 1 | 1 |

Supplementary Table 8

|                                             |   |   |
|---------------------------------------------|---|---|
| Trichophyton soudanense cbs 452 61          | 1 | 1 |
| Trichophyton tonsurans cbs 112818           | 1 | 1 |
| Trichophyton verrucosum hki 0517            | 1 | 1 |
| Uncinocarpus reesii 1704                    | 1 | 1 |
| Coccidioides immitis rs                     | 1 | 1 |
| Coccidioides immitis rmscc 3703             | 1 | 1 |
| Coccidioides immitis rmscc 2394             | 1 | 1 |
| Coccidioides immitis h538 4                 | 1 | 1 |
| Coccidioides posadasii str silveira         | 1 | 1 |
| Coccidioides posadasii rmscc 3488           | 1 | 1 |
| Coccidioides posadasii c735 delta sowgp     | 1 | 1 |
| Paracoccidioides brasiliensis pb18          | 1 | 1 |
| Paracoccidioides brasiliensis pb03          | 1 | 1 |
| Paracoccidioides sp lutzii pb01             | 1 | 1 |
| Blumeria graminis                           | 1 | 0 |
| Blumeria graminis f sp tritici 96224        | 1 | 0 |
| Erysiphe necator                            | 1 | 0 |
| Marssonina brunnea f sp multigermtubi mb m1 | 1 | 0 |
| Glarea lozoyensis atcc 20868                | 1 | 1 |
| Glarea lozoyensis 74030                     | 1 | 1 |
| Phialocephala scopiformis                   | 1 | 0 |
| Botrytis cinerea                            | 1 | 1 |
| Botrytis cinerea t4                         | 1 | 1 |
| Botrytis cinerea bcdw1                      | 1 | 1 |
| Sclerotinia borealis f 4157                 | 1 | 1 |
| Sclerotinia sclerotiorum                    | 1 | 1 |
| Oidiodendron maius zn                       | 1 | 1 |
| Pseudogymnoascus destructans 20631 21       | 1 | 1 |
| Pseudogymnoascus sp vkm f 4520 fw 2644      | 1 | 1 |
| Pseudogymnoascus sp vkm f 4519 fw 2642      | 1 | 1 |
| Pseudogymnoascus sp vkm f 4518 fw 2643      | 0 | 1 |
| Pseudogymnoascus sp vkm f 4517 fw 2822      | 1 | 1 |
| Pseudogymnoascus sp vkm f 4516 fw 969       | 1 | 1 |
| Pseudogymnoascus sp vkm f 4515 fw 2607      | 1 | 1 |
| Pseudogymnoascus sp vkm f 4514 fw 929       | 1 | 1 |
| Pseudogymnoascus sp vkm f 4513 fw 928       | 1 | 1 |
| Pseudogymnoascus sp vkm f 4281 fw 2241      | 1 | 1 |
| Pseudogymnoascus sp vkm f 4246              | 1 | 1 |
| Pseudogymnoascus sp vkm f 3808              | 1 | 1 |
| Pseudogymnoascus sp vkm f 3557              | 1 | 1 |
| Pseudogymnoascus sp vkm f 103               | 1 | 1 |
| Colletotrichum fioriniae pj7                | 1 | 1 |
| Colletotrichum gloeosporioides              | 1 | 1 |
| Colletotrichum gloeosporioides cg 14        | 1 | 1 |

Supplementary Table 8

|                                                  |   |   |
|--------------------------------------------------|---|---|
| Colletotrichum graminicola                       | 1 | 1 |
| Colletotrichum nymphaeae sa 01                   | 1 | 1 |
| Colletotrichum orbiculare                        | 1 | 1 |
| Colletotrichum higginsianum                      | 1 | 1 |
| Colletotrichum incanum                           | 1 | 1 |
| Colletotrichum salicis                           | 1 | 1 |
| Colletotrichum simmondsii                        | 1 | 1 |
| Colletotrichum sublineola                        | 1 | 1 |
| Colletotrichum tofieldiae                        | 1 | 1 |
| Verticillium alfalfae vams 102                   | 1 | 1 |
| Verticillium dahliae                             | 1 | 1 |
| Verticillium dahliaejr2                          | 1 | 1 |
| Verticillium longisporum                         | 1 | 1 |
| Verticillium longisporum gca 001268165           | 1 | 1 |
| Metarhizium acridum cqma 102                     | 1 | 1 |
| Metarhizium album arsef 1941                     | 1 | 1 |
| Metarhizium anisopliae                           | 1 | 1 |
| Metarhizium anisopliae brip 53293                | 1 | 1 |
| Metarhizium anisopliae brip 53284                | 1 | 1 |
| Metarhizium anisopliae arsef 549                 | 1 | 1 |
| Metarhizium brunneum arsef 3297                  | 1 | 1 |
| Metarhizium guizhouense arsef 977                | 1 | 1 |
| Metarhizium majus arsef 297                      | 1 | 1 |
| Metarhizium anisopliae arsef 23                  | 1 | 1 |
| Metarhizium robertsii                            | 1 | 1 |
| Torrubiella hemipterigena                        | 1 | 1 |
| Beauveria bassiana d1 5                          | 1 | 1 |
| Beauveria bassiana arsef 2860                    | 1 | 1 |
| Cordyceps militaris cm01                         | 1 | 1 |
| Trichoderma atroviride imi 206040                | 1 | 1 |
| Trichoderma reesei                               | 1 | 1 |
| Trichoderma reesei rut c 30                      | 1 | 1 |
| Trichoderma virens                               | 1 | 1 |
| Trichoderma gamsii                               | 1 | 1 |
| Trichoderma harzianum                            | 1 | 1 |
| Acremonium chrysogenum atcc 11550                | 1 | 1 |
| Ustilaginoidea virens                            | 1 | 1 |
| Fusarium verticillioides                         | 1 | 1 |
| Fusarium oxysporum                               | 1 | 1 |
| Fusarium oxysporum fosc 3 a                      | 1 | 1 |
| Fusarium oxysporum fo47                          | 1 | 1 |
| Fusarium oxysporum f sp vasinfectum 25433        | 1 | 1 |
| Fusarium oxysporum f sp raphani 54005            | 1 | 1 |
| Fusarium oxysporum f sp radicis lycopersici 2638 | 1 | 1 |

Supplementary Table 8

|                                                          |   |   |
|----------------------------------------------------------|---|---|
| <i>Fusarium oxysporum</i> f sp pisi hdv247               | 1 | 1 |
| <i>Fusarium oxysporum</i> f sp melonis 26406             | 1 | 1 |
| <i>Fusarium oxysporum</i> f sp lycopersici mn25          | 1 | 1 |
| <i>Fusarium oxysporum</i> f sp cubense tropical race 4   | 1 | 1 |
| <i>Fusarium oxysporum</i> f sp conglutinans race 2 54    | 1 | 1 |
| <i>Fusarium oxysporum</i> f sp cubense race 4            | 1 | 1 |
| <i>Fusarium oxysporum</i> f sp cubense race 1            | 1 | 1 |
| <i>Fusarium pseudograminearum</i>                        | 1 | 1 |
| <i>Fusarium solani</i>                                   | 1 | 1 |
| <i>Fusarium fujikuroi</i>                                | 1 | 1 |
| <i>Fusarium fujikuroi</i> gca 001023065                  | 1 | 1 |
| <i>Fusarium fujikuroi</i> gca 001023045                  | 1 | 1 |
| <i>Fusarium fujikuroi</i> gca 001023035                  | 1 | 1 |
| <i>Fusarium graminearum</i>                              | 1 | 1 |
| <i>Fusarium graminearum</i> gca 000599445                | 1 | 1 |
| <i>Fusarium langsethiae</i>                              | 1 | 1 |
| <i>Neonectria ditissima</i>                              | 1 | 1 |
| <i>Drechmeria coniospora</i>                             | 1 | 1 |
| <i>Hirsutella minnesotensis</i> 3608                     | 1 | 1 |
| <i>Ophiocordyceps sinensis</i> co18                      | 1 | 1 |
| <i>Ophiocordyceps unilateralis</i>                       | 1 | 1 |
| <i>Tolypocladium ophioglossoides</i> cbs 100239          | 1 | 1 |
| <i>Stachybotrys chartarum</i> ibt 7711                   | 1 | 1 |
| <i>Stachybotrys chartarum</i> ibt 40293                  | 1 | 1 |
| <i>Stachybotrys chartarum</i> ibt 40288                  | 1 | 1 |
| <i>Stachybotrys chlorohalonata</i> ibt 40285             | 1 | 1 |
| <i>Ceratocystis platani</i>                              | 1 | 0 |
| <i>Thielaviopsis punctulata</i>                          | 1 | 1 |
| <i>Diaporthe ampelina</i>                                | 1 | 1 |
| <i>Gaeumannomyces graminis</i>                           | 1 | 1 |
| <i>Magnaporthe oryzae</i>                                | 1 | 1 |
| <i>Magnaporthe poae</i>                                  | 1 | 1 |
| <i>Grosmannia clavigera</i> kw1407                       | 1 | 1 |
| <i>Ophiostoma piceae</i> uamh 11346                      | 1 | 1 |
| <i>Sporothrix brasiliensis</i> 5110                      | 1 | 1 |
| <i>Sporothrix schenckii</i> atcc 58251                   | 1 | 1 |
| <i>Sporothrix schenckii</i> 1099 18                      | 1 | 1 |
| <i>Chaetomium thermophilum</i> var <i>thermophilum</i> d | 1 | 1 |
| <i>Chaetomium globosum</i> cbs 148 51                    | 1 | 1 |
| <i>Myceliophthora thermophila</i> atcc 42464             | 1 | 1 |
| <i>Thielavia terrestris</i> nrsl 8126                    | 1 | 1 |
| <i>Podospora anserina</i> s mat                          | 1 | 1 |
| <i>Neurospora crassa</i> gca 000786625                   | 1 | 1 |
| <i>Neurospora tetrasperma</i> fgsc 2509                  | 1 | 1 |

Supplementary Table 8

|                                              |   |   |
|----------------------------------------------|---|---|
| <i>Neurospora tetrasperma</i> fgsc 2508      | 1 | 1 |
| <i>Neurospora crassa</i>                     | 1 | 1 |
| <i>Sordaria macrospora</i>                   | 1 | 1 |
| <i>Madurella mycetomatis</i>                 | 1 | 1 |
| <i>Phaeoacremonium minimum</i> ucrpa7        | 1 | 1 |
| <i>Eutypa lata</i> ucrel1                    | 1 | 1 |
| <i>Microdochium bolleyi</i>                  | 1 | 1 |
| <i>Pestalotiopsis fici</i> w106 1            | 1 | 1 |
| <i>Rosellinia necatrix</i>                   | 1 | 1 |
| <i>Xylona heveae</i> tc161                   | 1 | 1 |
| <i>Dactylellina haptotyla</i> cbs 200 50     | 1 | 1 |
| <i>Drechslerella stenobrocha</i> 248         | 0 | 0 |
| <i>Arthrobotrys oligospora</i> atcc 24927    | 1 | 1 |
| <i>Pyronema omphalodes</i> cbs 100304        | 1 | 1 |
| <i>Tuber melanosporum</i>                    | 1 | 1 |
| <i>Candida albicans</i> wo 1                 | 0 | 0 |
| <i>Candida albicans</i> sc5314               | 0 | 0 |
| <i>Candida albicans</i> sc5314 gca 000784655 | 0 | 0 |
| <i>Candida albicans</i> sc5314 gca 000784635 | 0 | 0 |
| <i>Candida albicans</i> p94015               | 0 | 0 |
| <i>Candida albicans</i> p87                  | 0 | 0 |
| <i>Candida albicans</i> p78048               | 0 | 0 |
| <i>Candida albicans</i> p78042               | 0 | 0 |
| <i>Candida albicans</i> p76067               | 0 | 0 |
| <i>Candida albicans</i> p76055               | 0 | 0 |
| <i>Candida albicans</i> p75063               | 0 | 0 |
| <i>Candida albicans</i> p75016               | 0 | 0 |
| <i>Candida albicans</i> p75010               | 0 | 0 |
| <i>Candida albicans</i> p60002               | 0 | 0 |
| <i>Candida albicans</i> p57072               | 0 | 0 |
| <i>Candida albicans</i> p57055               | 0 | 0 |
| <i>Candida albicans</i> p37039               | 0 | 0 |
| <i>Candida albicans</i> p37037               | 0 | 0 |
| <i>Candida albicans</i> p37005               | 0 | 0 |
| <i>Candida albicans</i> p34048               | 0 | 0 |
| <i>Candida albicans</i> l26                  | 0 | 0 |
| <i>Candida albicans</i> gc75                 | 0 | 0 |
| <i>Candida albicans</i> ca6                  | 0 | 0 |
| <i>Candida albicans</i> 19f                  | 0 | 0 |
| <i>Candida albicans</i> 12c                  | 0 | 0 |
| <i>Candida dubliniensis</i> cd36             | 0 | 0 |
| <i>Candida maltosa</i> xu316                 | 0 | 0 |
| <i>Candida orthopsilosis</i> co 90 125       | 0 | 0 |
| <i>Candida tropicalis</i> mya 3404           | 0 | 0 |

Supplementary Table 8

|                                               |   |   |
|-----------------------------------------------|---|---|
| <i>Candida parapsilosis</i> cdc317            | 0 | 0 |
| <i>Lodderomyces elongisporus</i> nrri yb 4239 | 0 | 0 |
| <i>Debaryomyces hansenii</i> cbs767           | 1 | 0 |
| <i>Debaryomyces fabryi</i>                    | 0 | 0 |
| <i>Meyerozyma guilliermondii</i> atcc 6260    | 1 | 0 |
| <i>Millerozyma farinosa</i> cbs 7064          | 0 | 0 |
| <i>Scheffersomyces stipitis</i> cbs 6054      | 0 | 0 |
| <i>Spathaspora passalidarum</i> nrri y 27907  | 0 | 0 |
| <i>Candida tenuis</i> atcc 10573              | 0 | 0 |
| <i>Geotrichum candidum</i>                    | 1 | 0 |
| <i>Yarrowia lipolytica</i>                    | 1 | 0 |
| <i>Candida auris</i>                          | 0 | 0 |
| <i>Clavispora lusitaniae</i> atcc 42720       | 0 | 0 |
| <i>Cyberlindnera jadinii</i>                  | 1 | 0 |
| <i>Komagataella pastoris</i>                  | 1 | 0 |
| <i>Komagataella pastoris</i> cbs 7435         | 1 | 0 |
| <i>Wickerhamomyces ciferrii</i>               | 1 | 0 |
| <i>Brettanomyces bruxellensis</i> awri1499    | 0 | 0 |
| <i>Ogataea parapolyomorpha</i> dl 1           | 1 | 0 |
| <i>Pichia kudriavzevii</i>                    | 1 | 0 |
| <i>Ashbya gossypii</i>                        | 0 | 0 |
| <i>Ashbya gossypii</i> fdag1                  | 0 | 0 |
| <i>Eremothecium sincaudum</i>                 | 0 | 0 |
| <i>Kazachstania africana</i> cbs 2517         | 0 | 0 |
| <i>Kazachstania naganishii</i> cbs 8797       | 0 | 0 |
| <i>Kluyveromyces marxianus</i>                | 0 | 0 |
| <i>Kluyveromyces lactis</i>                   | 0 | 0 |
| <i>Kluyveromyces marxianus</i> dmku3 1042     | 0 | 0 |
| <i>Lachancea thermotolerans</i> cbs 6340      | 1 | 0 |
| <i>Lachancea lanzarotensis</i>                | 1 | 0 |
| <i>Candida glabrata</i>                       | 0 | 0 |
| <i>Candida glabrata</i> gca 001466685         | 0 | 0 |
| <i>Candida glabrata</i> gca 001466635         | 0 | 0 |
| <i>Candida glabrata</i> gca 001466575         | 0 | 0 |
| <i>Candida glabrata</i> gca 001466565         | 0 | 0 |
| <i>Candida glabrata</i> gca 001466535         | 0 | 0 |
| <i>Candida glabrata</i> gca 001466525         | 0 | 0 |
| <i>Naumovozya castellii</i> cbs 4309          | 0 | 0 |
| <i>Naumovozya dairenensis</i> cbs 421         | 0 | 0 |
| <i>Saccharomyces arboricola</i> h 6           | 0 | 0 |
| <i>Saccharomyces cerevisiae</i>               | 0 | 0 |
| <i>Saccharomyces cerevisiae</i> yjm996        | 0 | 0 |
| <i>Saccharomyces cerevisiae</i> yjm993        | 0 | 0 |
| <i>Saccharomyces cerevisiae</i> yjm990        | 0 | 0 |

Supplementary Table 8

|                                         |   |   |
|-----------------------------------------|---|---|
| <i>Saccharomyces cerevisiae</i> yjm987  | 0 | 0 |
| <i>Saccharomyces cerevisiae</i> yjm984  | 0 | 0 |
| <i>Saccharomyces cerevisiae</i> yjm981  | 0 | 0 |
| <i>Saccharomyces cerevisiae</i> yjm978  | 0 | 0 |
| <i>Saccharomyces cerevisiae</i> yjm975  | 0 | 0 |
| <i>Saccharomyces cerevisiae</i> yjm972  | 0 | 0 |
| <i>Saccharomyces cerevisiae</i> yjm969  | 0 | 0 |
| <i>Saccharomyces cerevisiae</i> yjm789  | 0 | 0 |
| <i>Saccharomyces cerevisiae</i> yjm693  | 0 | 0 |
| <i>Saccharomyces cerevisiae</i> yjm689  | 0 | 0 |
| <i>Saccharomyces cerevisiae</i> yjm683  | 0 | 0 |
| <i>Saccharomyces cerevisiae</i> yjm682  | 0 | 0 |
| <i>Saccharomyces cerevisiae</i> yjm681  | 0 | 0 |
| <i>Saccharomyces cerevisiae</i> yjm627  | 0 | 0 |
| <i>Saccharomyces cerevisiae</i> yjm555  | 0 | 0 |
| <i>Saccharomyces cerevisiae</i> yjm554  | 0 | 0 |
| <i>Saccharomyces cerevisiae</i> yjm541  | 0 | 0 |
| <i>Saccharomyces cerevisiae</i> yjm470  | 0 | 0 |
| <i>Saccharomyces cerevisiae</i> yjm456  | 0 | 0 |
| <i>Saccharomyces cerevisiae</i> yjm453  | 0 | 0 |
| <i>Saccharomyces cerevisiae</i> yjm451  | 0 | 0 |
| <i>Saccharomyces cerevisiae</i> yjm450  | 0 | 0 |
| <i>Saccharomyces cerevisiae</i> yjm428  | 0 | 0 |
| <i>Saccharomyces cerevisiae</i> yjm326  | 0 | 0 |
| <i>Saccharomyces cerevisiae</i> yjm320  | 0 | 0 |
| <i>Saccharomyces cerevisiae</i> yjm271  | 0 | 0 |
| <i>Saccharomyces cerevisiae</i> yjm270  | 0 | 0 |
| <i>Saccharomyces cerevisiae</i> yjm248  | 0 | 0 |
| <i>Saccharomyces cerevisiae</i> yjm244  | 0 | 0 |
| <i>Saccharomyces cerevisiae</i> yjm195  | 0 | 0 |
| <i>Saccharomyces cerevisiae</i> yjm193  | 0 | 0 |
| <i>Saccharomyces cerevisiae</i> yjm189  | 0 | 0 |
| <i>Saccharomyces cerevisiae</i> yjm1615 | 0 | 0 |
| <i>Saccharomyces cerevisiae</i> yjm1592 | 0 | 0 |
| <i>Saccharomyces cerevisiae</i> yjm1574 | 0 | 0 |
| <i>Saccharomyces cerevisiae</i> yjm1573 | 0 | 0 |
| <i>Saccharomyces cerevisiae</i> yjm1549 | 0 | 0 |
| <i>Saccharomyces cerevisiae</i> yjm1527 | 0 | 0 |
| <i>Saccharomyces cerevisiae</i> yjm1526 | 0 | 0 |
| <i>Saccharomyces cerevisiae</i> yjm1479 | 0 | 0 |
| <i>Saccharomyces cerevisiae</i> yjm1478 | 0 | 0 |
| <i>Saccharomyces cerevisiae</i> yjm1477 | 0 | 0 |
| <i>Saccharomyces cerevisiae</i> yjm1463 | 0 | 0 |
| <i>Saccharomyces cerevisiae</i> yjm1460 | 0 | 0 |

Supplementary Table 8

|                                         |   |   |
|-----------------------------------------|---|---|
| <i>Saccharomyces cerevisiae</i> yjm1450 | 0 | 0 |
| <i>Saccharomyces cerevisiae</i> yjm1447 | 0 | 0 |
| <i>Saccharomyces cerevisiae</i> yjm1444 | 0 | 0 |
| <i>Saccharomyces cerevisiae</i> yjm1443 | 0 | 0 |
| <i>Saccharomyces cerevisiae</i> yjm1439 | 0 | 0 |
| <i>Saccharomyces cerevisiae</i> yjm1434 | 0 | 0 |
| <i>Saccharomyces cerevisiae</i> yjm1433 | 0 | 0 |
| <i>Saccharomyces cerevisiae</i> yjm1419 | 0 | 0 |
| <i>Saccharomyces cerevisiae</i> yjm1418 | 0 | 0 |
| <i>Saccharomyces cerevisiae</i> yjm1417 | 0 | 0 |
| <i>Saccharomyces cerevisiae</i> yjm1415 | 0 | 0 |
| <i>Saccharomyces cerevisiae</i> yjm1402 | 0 | 0 |
| <i>Saccharomyces cerevisiae</i> yjm1401 | 0 | 0 |
| <i>Saccharomyces cerevisiae</i> yjm1400 | 0 | 0 |
| <i>Saccharomyces cerevisiae</i> yjm1399 | 0 | 0 |
| <i>Saccharomyces cerevisiae</i> yjm1389 | 0 | 0 |
| <i>Saccharomyces cerevisiae</i> yjm1388 | 0 | 0 |
| <i>Saccharomyces cerevisiae</i> yjm1387 | 0 | 0 |
| <i>Saccharomyces cerevisiae</i> yjm1386 | 0 | 0 |
| <i>Saccharomyces cerevisiae</i> yjm1385 | 0 | 0 |
| <i>Saccharomyces cerevisiae</i> yjm1383 | 0 | 0 |
| <i>Saccharomyces cerevisiae</i> yjm1381 | 0 | 0 |
| <i>Saccharomyces cerevisiae</i> yjm1356 | 0 | 0 |
| <i>Saccharomyces cerevisiae</i> yjm1355 | 0 | 0 |
| <i>Saccharomyces cerevisiae</i> yjm1342 | 0 | 0 |
| <i>Saccharomyces cerevisiae</i> yjm1341 | 0 | 0 |
| <i>Saccharomyces cerevisiae</i> yjm1338 | 0 | 0 |
| <i>Saccharomyces cerevisiae</i> yjm1336 | 0 | 0 |
| <i>Saccharomyces cerevisiae</i> yjm1332 | 0 | 0 |
| <i>Saccharomyces cerevisiae</i> yjm1326 | 0 | 0 |
| <i>Saccharomyces cerevisiae</i> yjm1311 | 0 | 0 |
| <i>Saccharomyces cerevisiae</i> yjm1307 | 0 | 0 |
| <i>Saccharomyces cerevisiae</i> yjm1304 | 0 | 0 |
| <i>Saccharomyces cerevisiae</i> yjm1273 | 0 | 0 |
| <i>Saccharomyces cerevisiae</i> yjm1252 | 0 | 0 |
| <i>Saccharomyces cerevisiae</i> yjm1250 | 0 | 0 |
| <i>Saccharomyces cerevisiae</i> yjm1248 | 0 | 0 |
| <i>Saccharomyces cerevisiae</i> yjm1244 | 0 | 0 |
| <i>Saccharomyces cerevisiae</i> yjm1242 | 0 | 0 |
| <i>Saccharomyces cerevisiae</i> yjm1208 | 0 | 0 |
| <i>Saccharomyces cerevisiae</i> yjm1202 | 0 | 0 |
| <i>Saccharomyces cerevisiae</i> yjm1199 | 0 | 0 |
| <i>Saccharomyces cerevisiae</i> yjm1190 | 0 | 0 |
| <i>Saccharomyces cerevisiae</i> yjm1133 | 0 | 0 |

Supplementary Table 8

|                                                             |   |   |
|-------------------------------------------------------------|---|---|
| <i>Saccharomyces cerevisiae</i> yjm1129                     | 0 | 0 |
| <i>Saccharomyces cerevisiae</i> yjm1083                     | 0 | 0 |
| <i>Saccharomyces cerevisiae</i> yjm1078                     | 0 | 0 |
| <i>Saccharomyces cerevisiae</i> x <i>saccharomyces kudr</i> | 0 | 0 |
| <i>Saccharomyces cerevisiae</i> vl3                         | 0 | 0 |
| <i>Saccharomyces cerevisiae</i> vin13                       | 0 | 0 |
| <i>Saccharomyces cerevisiae</i> rm11 1a                     | 0 | 0 |
| <i>Saccharomyces cerevisiae</i> r103                        | 0 | 0 |
| <i>Saccharomyces cerevisiae</i> r008                        | 0 | 0 |
| <i>Saccharomyces cerevisiae</i> p301                        | 0 | 0 |
| <i>Saccharomyces cerevisiae</i> p283                        | 0 | 0 |
| <i>Saccharomyces cerevisiae</i> lalvin qa23                 | 0 | 0 |
| <i>Saccharomyces cerevisiae</i> kyokai no 7                 | 0 | 0 |
| <i>Saccharomyces cerevisiae</i> gca 000091065               | 0 | 0 |
| <i>Saccharomyces cerevisiae</i> fosterso                    | 0 | 0 |
| <i>Saccharomyces cerevisiae</i> fostersb                    | 0 | 0 |
| <i>Saccharomyces cerevisiae</i> ec1118                      | 0 | 0 |
| <i>Saccharomyces cerevisiae</i> awri796                     | 0 | 0 |
| <i>Saccharomyces kudriavzevii</i> ifo 1802                  | 0 | 0 |
| <i>Saccharomyces cerevisiae</i> cen pk113 7d                | 0 | 0 |
| <i>Saccharomyces eubayanus</i>                              | 0 | 0 |
| <i>Saccharomyces</i> sp <i>boulardii</i> gca 001413975      | 0 | 0 |
| <i>Saccharomyces</i> sp <i>boulardii</i>                    | 0 | 0 |
| <i>Saccharomycetaceae</i> sp <i>ashbya aceri</i>            | 0 | 0 |
| <i>Tetrapisispora blattae</i> cbs 6284                      | 0 | 0 |
| <i>Tetrapisispora phaffii</i> cbs 4417                      | 0 | 0 |
| <i>Torulaspora delbrueckii</i>                              | 0 | 0 |
| <i>Vanderwaltozyma polyspora</i> dsm 70294                  | 0 | 0 |
| <i>Zygosaccharomyces bailii</i> isa1307                     | 1 | 0 |
| <i>Zygosaccharomyces rouxii</i>                             | 1 | 0 |
| <i>Kuraishia capsulata</i> cbs 1993                         | 1 | 0 |
| <i>Hanseniaspora uvarum</i> dsm 2768                        | 0 | 0 |
| <i>Pneumocystis carinii</i> b80                             | 0 | 0 |
| <i>Pneumocystis jirovecii</i> ru7                           | 0 | 0 |
| <i>Schizosaccharomyces cryophilus</i>                       | 0 | 0 |
| <i>Schizosaccharomyces japonicus</i>                        | 0 | 0 |
| <i>Schizosaccharomyces octosporus</i>                       | 0 | 0 |
| <i>Schizosaccharomyces pombe</i>                            | 0 | 0 |
| <i>Saitoella complicata</i> nrml y 17804                    | 1 | 1 |
| <i>Botryobasidium botryosum</i> fd 172 ss1                  | 1 | 1 |
| <i>Rhizoctonia solani</i> ag 8 wac10335                     | 1 | 1 |
| <i>Rhizoctonia solani</i> ag 1 ia                           | 1 | 1 |
| <i>Rhizoctonia solani</i> ag 3 rhs1ap                       | 1 | 1 |
| <i>Rhizoctonia solani</i> ag 1 ib                           | 1 | 1 |

Supplementary Table 8

|                                                        |   |   |
|--------------------------------------------------------|---|---|
| <i>Rhizoctonia solani</i> 123e                         | 1 | 1 |
| <i>Tulasnella calospora</i> mut 4182                   | 1 | 1 |
| <i>Cylindrobasidium torrendii</i> fp15055 ss 10        | 1 | 1 |
| <i>Schizopora paradoxa</i>                             | 1 | 1 |
| <i>Punctularia strigosozonata</i> hhb 11173 ss5        | 0 | 0 |
| <i>Gloeophyllum trabeum</i> atcc 11539                 | 1 | 1 |
| <i>Fomitiporia mediterranea</i> mf3 22                 | 1 | 1 |
| <i>Gelatoporia subvermispora</i> b                     | 1 | 1 |
| <i>Postia placenta</i> mad 698 r                       | 0 | 1 |
| <i>Trametes versicolor</i> fp 101664 ss1               | 0 | 0 |
| <i>Trametes cinnabarina</i>                            | 1 | 1 |
| <i>Fomitopsis pinicola</i> fp 58527 ss1                | 1 | 1 |
| <i>Phanerochaete carnosae</i> hhb 10118 sp             | 1 | 1 |
| <i>Phlebiopsis gigantea</i> 11061 1 cr5 6              | 1 | 1 |
| <i>Dichomitus squalens</i> lyad 421 ss1                | 1 | 0 |
| <i>Fibroporia radiculosa</i>                           | 1 | 1 |
| <i>Heterobasidion irregulare</i> tc 32 1               | 1 | 1 |
| <i>Stereum hirsutum</i> fp 91666 ss1                   | 0 | 0 |
| <i>Piriformospora indica</i> dsm 11827                 | 1 | 1 |
| <i>Serendipita vermifera</i> maff 305830               | 1 | 1 |
| <i>Agaricus bisporus</i> var <i>burnettii</i> jb137 s8 | 1 | 1 |
| <i>Agaricus bisporus</i> var <i>bisporus</i> h97       | 1 | 1 |
| <i>Leucoagaricus</i> sp symc cos                       | 1 | 1 |
| <i>Plicaturopsis crispa</i> fd 325 ss 3                | 1 | 0 |
| <i>Amanita muscaria</i> koide bx008                    | 1 | 1 |
| <i>Hebeloma cylindrosporum</i> h7                      | 1 | 1 |
| <i>Fistulina hepatica</i> atcc 64428                   | 1 | 1 |
| <i>Hypsizygus marmoreus</i>                            | 1 | 1 |
| <i>Termitomyces</i> sp j132                            | 1 | 1 |
| <i>Moniliophthora perniciosa</i> fa553                 | 1 | 1 |
| <i>Moniliophthora roreri</i>                           | 1 | 1 |
| <i>Moniliophthora roreri</i> mca 2997                  | 1 | 1 |
| <i>Gymnopus luxurians</i> fd 317 m1                    | 1 | 1 |
| <i>Pleurotus ostreatus</i> pc15                        | 1 | 1 |
| <i>Schizophyllum commune</i> h4 8                      | 1 | 1 |
| <i>Galerina marginata</i> cbs 339 88                   | 1 | 1 |
| <i>Hypholoma sublateritium</i> fd 334 ss 4             | 1 | 1 |
| <i>Laccaria amethystina</i> laam 08 1                  | 1 | 1 |
| <i>Laccaria bicolor</i> s238n h82                      | 1 | 1 |
| <i>Fibulorhizoctonia</i> sp cbs 109695                 | 1 | 1 |
| <i>Piloderma croceum</i> f 1598                        | 1 | 1 |
| <i>Coniophora puteana</i> rwd 64 598 ss2               | 1 | 1 |
| <i>Serpula lacrymans</i> var <i>lacrymans</i> s7 9     | 1 | 1 |
| <i>Serpula lacrymans</i> var <i>lacrymans</i> s7 3     | 1 | 1 |

Supplementary Table 8

|                                              |   |   |
|----------------------------------------------|---|---|
| Hydnomerulius pinastri md 312                | 1 | 1 |
| Paxillus involutus atcc 200175               | 1 | 1 |
| Paxillus rubicundulus ve08 2h10              | 1 | 1 |
| Pisolithus microcarpus 441                   | 1 | 1 |
| Pisolithus tinctorius marx 270               | 1 | 1 |
| Scleroderma citrinum foug a                  | 1 | 1 |
| Suillus luteus uh slu lm8 n1                 | 1 | 1 |
| Jaapia argillacea mucl 33604                 | 1 | 1 |
| Sphaerobolus stellatus ss14                  | 1 | 1 |
| Dacryopinax sp djm 731 ss1                   | 1 | 1 |
| Xanthophyllomyces dendrorhous                | 0 | 0 |
| Cryptococcus gattii wm276                    | 1 | 0 |
| Cryptococcus gattii ru294                    | 1 | 0 |
| Cryptococcus gattii ram5                     | 0 | 0 |
| Cryptococcus gattii r265                     | 0 | 0 |
| Cryptococcus gattii nt 10                    | 1 | 0 |
| Cryptococcus gattii mmrl2647                 | 0 | 0 |
| Cryptococcus gattii la55                     | 0 | 0 |
| Cryptococcus gattii ind107                   | 1 | 0 |
| Cryptococcus gattii ejb2                     | 1 | 0 |
| Cryptococcus gattii e566                     | 1 | 0 |
| Cryptococcus gattii cbs 10090                | 0 | 0 |
| Cryptococcus gattii ca1873                   | 1 | 0 |
| Cryptococcus gattii ca1280                   | 1 | 0 |
| Cryptococcus gattii ca1014                   | 0 | 0 |
| Cryptococcus gattii 99 473                   | 0 | 0 |
| Cryptococcus gattii 2001 935 1               | 0 | 0 |
| Cryptococcus neoformans                      | 0 | 0 |
| Cryptococcus neoformans var neoformans b 350 | 1 | 0 |
| Cryptococcus neoformans var grubii h99       | 0 | 0 |
| Tremella mesenterica dsm 1558                | 0 | 0 |
| Trichosporon asahii var asahii cbs 8904      | 1 | 1 |
| Trichosporon asahii var asahii cbs 2479      | 1 | 1 |
| Trichosporon oleaginosus                     | 1 | 1 |
| Wallemia ichthyophaga exf 994                | 0 | 0 |
| Wallemia mellicola cbs 633 66                | 1 | 0 |
| Rhodotorula sp jg 1b                         | 1 | 1 |
| Microbotryum violaceum                       | 1 | 1 |
| Rhodotorula glutinis atcc 204091             | 1 | 0 |
| Rhodotorula graminis wp1                     | 1 | 0 |
| Rhodotorula toruloides                       | 1 | 1 |
| Rhodotorula toruloides np11                  | 1 | 1 |
| Sporidiobolus salmonicolor                   | 1 | 0 |
| Mixia osmundae iam 14324                     | 1 | 0 |

Supplementary Table 8

|                                               |   |   |
|-----------------------------------------------|---|---|
| Mixia osmundae iam 14324 gca 000708205        | 1 | 0 |
| Melampsora laricipopulina                     | 1 | 1 |
| Puccinia graminis                             | 1 | 1 |
| Puccinia graminisug99                         | 1 | 1 |
| Puccinia striiformis f sp tritici pst 78      | 1 | 1 |
| Puccinia triticina                            | 0 | 1 |
| Puccinia sorghi                               | 1 | 1 |
| Ceraceosorus bombacis                         | 1 | 1 |
| Tilletiaria anomala ubc 951                   | 1 | 0 |
| Malassezia sympodialis atcc 42132             | 1 | 1 |
| Malassezia pachydermatis                      | 0 | 0 |
| Anthracozygia flocculosa pf 1                 | 0 | 1 |
| Kalmanozyma brasiliensis ghg001               | 1 | 1 |
| Moesziomyces aphidis dsm 70725                | 1 | 1 |
| Moesziomyces antarcticus                      | 0 | 1 |
| Pseudozyma hubeiensis sy62                    | 1 | 0 |
| Sporisorium reilianum                         | 1 | 1 |
| Sporisorium scitamineum                       | 0 | 0 |
| Ustilago maydis                               | 1 | 0 |
| Ustilago hordei                               | 1 | 1 |
| Conidiobolus coronatus nrri 28638             | 0 | 1 |
| Mortierella verticillata nrri 6337            | 1 | 1 |
| Lichtheimia corymbifera jmrc fsu 9682         | 0 | 1 |
| Lichtheimia ramosa                            | 0 | 1 |
| Mucor circinelloides f circinelloides 1006phl | 0 | 0 |
| Mucor ambiguus                                | 0 | 0 |
| Parasitella parasitica                        | 0 | 0 |
| Rhizopus delemar ra 99 880                    | 0 | 0 |
| Rhizophagus irregularis daom 197198w          | 1 | 1 |
| Rhizophagus irregularis daom 181602           | 1 | 1 |
| Enterocytozoon bieneusi h348                  | 0 | 0 |
| Nosema apis brl 01                            | 0 | 0 |
| Nosema bombycis cq1                           | 0 | 0 |
| Nosema ceranae                                | 0 | 0 |
| Nosema ceranae brl01                          | 0 | 0 |
| Vittaforma corneae atcc 50505                 | 0 | 0 |
| Spraguea lophii 42 110                        | 0 | 0 |
| Anncaliia algerae pra339                      | 0 | 0 |
| Anncaliia algerae pra109                      | 0 | 0 |
| Encephalitozoon cuniculi gb m1                | 0 | 0 |
| Encephalitozoon cuniculi ecuniii l            | 0 | 0 |
| Encephalitozoon intestinalis atcc 50506       | 0 | 0 |
| Edhazardia aedis usnm 41457                   | 0 | 0 |
| Mitosporidium daphniae                        | 0 | 0 |

Supplementary Table 8

|                                   |   |   |
|-----------------------------------|---|---|
| Nematocida parisii ertm3          | 0 | 0 |
| Nematocida parisii ertm1          | 0 | 0 |
| Nematocida sp 1 ertm6             | 0 | 0 |
| Nematocida sp 1 ertm2             | 0 | 0 |
| Ordospora colligata oc4           | 0 | 0 |
| Pseudoloma neurophilia            | 0 | 0 |
| Trachipleistophora hominis        | 0 | 0 |
| Vavraia culicis subsp floridensis | 0 | 0 |

Supplemental Table 9

|                                    | ALKB2 |
|------------------------------------|-------|
| <i>Blattella germanica</i>         | 1     |
| <i>Nicrophorus vespilloides</i>    | 0     |
| <i>Tribolium castaneum</i>         | 1     |
| <i>Aedes aegypti</i>               | 0     |
| <i>Aedes albopictus</i>            | 0     |
| <i>Anopheles gambiae str. PEST</i> | 0     |
| <i>Culex quinquefasciatus</i>      | 0     |
| <i>Drosophila melanogaster</i>     | 0     |
| <i>Acyrtosiphon pisum</i>          | 1     |
| <i>Apis mellifera</i>              | 0     |
| <i>Camponotus floridanus</i>       | 0     |
| <i>Copidosoma floridanum</i>       | 0     |
| <i>Harpegnathos saltator</i>       | 0     |
| <i>Microplitis demolitor</i>       | 0     |
| <i>Nasonia vitripennis</i>         | 0     |
| <i>Polistes canadensis</i>         | 0     |
| <i>Solenopsis invicta</i>          | 0     |
| <i>Bombyx mori</i>                 | 0     |
| <i>Parhyale hawaiiensis</i>        | 1     |
| <i>Daphnia pulex</i>               | 0     |
| <i>Daphnia magna</i>               | 0     |
| <i>Schistocerca gregaria</i>       | 1     |
